# Supplementary material
Source: PubMed Central journal article supplement (PMC4114957)
Supplement: supp_tpc.114.126631_tpc126631_Supplemental.pdf [file supp_tpc.114.126631_tpc126631_Supplemental.pdf]

Supplemental Data. Zeng and Cheng (2014). Plant Cell 10.1105/tpc.114.126631

```

*      20      *      40      *      60      *      80
FAE1-E1 : MTSVNVKLLYHYVITNLFNLCFFPLTAIVAGKASRLTIDDLHLLYYSYLOHNLTIAELFAFTVFGSVLYIVTRPKPVYLVE : 82
FAE1-E2 : MTSVNVKLLYHYVITNLFNLCFFPLTAIVAGKASRLTIDDLHLLYYSYLOHNLTIAELFAFTVFGSVLYIVTRPKPVYLVE : 82
FAE1-E3 : MTSVNVKLLYHYVITNLFNLCFFPLTAIVAGKASRLTIDDLHLLYYSYLOHNLTIAELFAFTVFGSVLYIVTRPKPVYLVE : 82
CAD90159 : MTSVNVKLLYHYVITNLFNLCFFPLTAIVAGKAYRLTIDDLHLLYYSYLOHNLTIAELFAFTVFGSVLYIATRBPVYLVE : 82
AF490461 : MTSVNVKLLYHYVITNLFNLCFFPLTAIVAGKAYRLTIDDLHLLYYSYLOHNLTIAELFAFTVFGSVLYIATRBPVYLVE : 82
AF490460 : MTSVNVKLLYHYVITNLFNLCFFPLTAIVAGKAYRLTIDDLHLLYYSYLOHNLTIAELFAFTVFGSVLYIATRBPVYLVE : 82
ACB55612 : MTSVNVKLLYHYVITNLFNLCFFPLTAIVAGKAYRLTIDDLHLLYYSYLOHNLTIAELFAFTVFGSVLYIATRBPVYLVE : 82
AF274750 : MTSVNVKLLYHYVITNLFNLCFFPLTAIVAGKAYRLTIDDLHLLYYSYLOHNLTIAELFAFTVFGSVLYIATRBPVYLVE : 82
NP_195178 : MTSVNVKLLYHYVITNLFNLCFFPLTAIVAGKASRLTIDDLHLLYYSYLOHNLTIAELFAFTVFGSVLYIVTRBPVYLVD : 81
    
```

```

*      100      *      120      *      140      *      160
FAE1-E1 : YSCYLPPTHCRSSISKVMDIFYQVRKADPS-RNGTCDSSWLEFLRKIQERSGLGDETHGPEGLLOVPPPKTFAAAREBTEQ : 163
FAE1-E2 : YSCYLPPTHCRSSISKVMDIFYQVRKADPS-RNGTCDSSWLEFLRKIQERSGLGDETHGPEGLLOVPPPKTFAAAREBTEQ : 163
FAE1-E3 : YSCYLPPTHCRSSISKVMDIFYQVRKADPS-RNGTCDSSWLEFLRKIQERSGLGDETHGPEGLLOVPPPKTFAAAREBTEQ : 163
CAD90159 : YSCYLPPTHCRSSISKVMDIFYQVRKADPS-RNGTCDSSWLEFLRKIQERSGLGDETHGPEGLLOVPPPKTFAAAREBTEQ : 163
AF490461 : YSCYLPPTHCRSSISKVMDIFYQVRKADPS-RNGTCDSSWLEFLRKIQERSGLGDETHGPEGLLOVPPPKTFAAAREBTEQ : 163
AF490460 : YSCYLPPTHCRSSISKVMDIFYQVRKADPS-RNGTCDSSWLEFLRKIQERSGLGDETHGPEGLLOVPPPKTFAAAREBTEQ : 163
ACB55612 : YSCYLPPTHCRSSISKVMDIFYQVRKADPS-RNGTCDSSWLEFLRKIQERSGLGDETHGPEGLLOVPPPKTFAAAREBTEQ : 163
AF274750 : YSCYLPPTHCRSSISKVMDIFYQVRKADPS-RNGTCDSSWLEFLRKIQERSGLGDETHGPEGLLOVPPPKTFAAAREBTEQ : 163
NP_195178 : YSCYLPPTHCRSSISKVMDIFYQVRKADPS-RNGTCDSSWLEFLRKIQERSGLGDETHGPEGLLOVPPPKTFAAAREBTEQ : 163
    
```

```

*      180      *      200      *      220      *      240
FAE1-E1 : VIIGALENLFKNTKVNPKBEIGILVVNSSMENPTPSLSAMVVNTFKLRSNVRSFNLGGMGCSAGVIAIDLAKDLLHVHKNTYA : 245
FAE1-E2 : VIIGALENLFKNTKVNPKBEIGILVVNSSMENPTPSLSAMVVNTFKLRSNVRSFNLGGMGCSAGVIAIDLAKDLLHVHKNTYA : 245
FAE1-E3 : VIIGALENLFKNTKVNPKBEIGILVVNSSMENPTPSLSAMVVNTFKLRSNVRSFNLGGMGCSAGVIAIDLAKDLLHVHKNTYA : 245
CAD90159 : VIIGALENLFKNTKVNPKBEIGILVVNSSMENPTPSLSAMVVNTFKLRSNVRSFNLGGMGCSAGVIAIDLAKDLLHVHKNTYA : 245
AF490461 : VIIGALENLFKNTKVNPKBEIGILVVNSSMENPTPSLSAMVVNTFKLRSNVRSFNLGGMGCSAGVIAIDLAKDLLHVHKNTYA : 245
AF490460 : VIIGALENLFKNTKVNPKBEIGILVVNSSMENPTPSLSAMVVNTFKLRSNVRSFNLGGMGCSAGVIAIDLAKDLLHVHKNTYA : 245
ACB55612 : VIIGALENLFKNTKVNPKBEIGILVVNSSMENPTPSLSAMVVNTFKLRSNVRSFNLGGMGCSAGVIAIDLAKDLLHVHKNTYA : 245
AF274750 : VIIGALENLFKNTKVNPKBEIGILVVNSSMENPTPSLSAMVVNTFKLRSNVRSFNLGGMGCSAGVIAIDLAKDLLHVHKNTYA : 245
NP_195178 : VIIGALENLFKNTKVNPKBEIGILVVNSSMENPTPSLSAMVVNTFKLRSNVRSFNLGGMGCSAGVIAIDLAKDLLHVHKNTYA : 245
    
```

```

*      260      *      280      *      300      *      320
FAE1-E1 : LVVSTENITYNIYAGDNRSMVSNCLFRVGGAAILLSNKPERDRRSKYELVHTVRTHTGADDKSFRVQVQGDDBSGKIGVSL : 327
FAE1-E2 : LVVSTENITYNIYAGDNRSMVSNCLFRVGGAAILLSNKPERDRRSKYELVHTVRTHTGADDKSFRVQVQGDDBSGKIGVSL : 327
FAE1-E3 : LVVSTENITYNIYAGDNRSMVSNCLFRVGGAAILLSNKPERDRRSKYELVHTVRTHTGADDKSFRVQVQGDDBSGKIGVSL : 327
CAD90159 : LVVSTENITYNIYAGDNRSMVSNCLFRVGGAAILLSNKPERDRRSKYELVHTVRTHTGADDKSFRVQVQGDDBSGKIGVSL : 327
AF490461 : LVVSTENITYNIYAGDNRSMVSNCLFRVGGAAILLSNKPERDRRSKYELVHTVRTHTGADDKSFRVQVQGDDBSGKIGVSL : 327
AF490460 : LVVSTENITYNIYAGDNRSMVSNCLFRVGGAAILLSNKPERDRRSKYELVHTVRTHTGADDKSFRVQVQGDDBSGKIGVSL : 327
ACB55612 : LVVSTENITYNIYAGDNRSMVSNCLFRVGGAAILLSNKPERDRRSKYELVHTVRTHTGADDKSFRVQVQGDDBSGKIGVSL : 327
AF274750 : LVVSTENITYNIYAGDNRSMVSNCLFRVGGAAILLSNKPERDRRSKYELVHTVRTHTGADDKSFRVQVQGDDBSGKIGVSL : 327
NP_195178 : LVVSTENITQCIYAGDNRSMVSNCLFRVGGAAILLSNKPERDRRSKYELVHTVRTHTGADDKSFRVQVQGDDBSGKIGVSL : 327
    
```

```

*      340      *      360      *      380      *      400
FAE1-E1 : SKDITDVAGRTVKKNIATLGLPLILPLSEKLLFFVTFIAKKLEKDKVKHYYVPDFKLAIDHFCIHAGGRAVIDVLEKNLALAP : 409
FAE1-E2 : SKDITDVAGRTVKKNIATLGLPLILPLSEKLLFFVTFIAKKLEKDKVKHYYVPDFKLAIDHFCIHAGGRAVIDVLEKNLALAP : 409
FAE1-E3 : SKDITDVAGRTVKKNIATLGLPLILPLSEKLLFFVTFIAKKLEKDKVKHYYVPDFKLAIDHFCIHAGGRAVIDVLEKNLALAP : 409
CAD90159 : SKDITDVAGRTVKKNIATLGLPLILPLSEKLLFFVTFMGKLEKDKVKHYYVPDFKLAIDHFCIHAGGRAVIDVLEKNLALAP : 409
AF490461 : SKDITDVAGRTVKKNIATLGLPLILPLSEKLLFFVTFMGKLEKDKVKHYYVPDFKLAIDHFCIHAGGRAVIDVLEKNLALAP : 409
AF490460 : SKDITDVAGRTVKKNIATLGLPLILPLSEKLLFFVTFMGKLEKDKVKHYYVPDFKLAIDHFCIHAGGRAVIDVLEKNLALAP : 409
ACB55612 : SKDITDVAGRTVKKNIATLGLPLILPLSEKLLFFVTFMGKLEKDKVKHYYVPDFKLAIDHFCIHAGGRAVIDVLEKNLALAP : 409
AF274750 : SKDITDVAGRTVKKNIATLGLPLILPLSEKLLFFVTFMGKLEKDKVKHYYVPDFKLAIDHFCIHAGGRAVIDVLEKNLALAP : 409
NP_195178 : SKDITDVAGRTVKKNIATLGLPLILPLSEKLLFFVTFMGKLEKDKVKHYYVPDFKLAIDHFCIHAGGRAVIDVLEKNLALAP : 409
    
```

```

          420      *      440      *      460      *      480      *
FAE1-E1 : IDVEASRSTLHRFGNTSSSSIWYELAYIEAKGRMKKGNKVVQIALGSGFKCNSAVWVALSNVKASTNSPWEHCIDRYPVQID : 491
FAE1-E2 : IDVEASRSTLHRFGNTSSSSIWYELAYIEAKGRMKKGNKVVQIALGSGFKCNSAVWVALSNVKASTNSPWEHCIDRYPVQID : 491
FAE1-E3 : IDVEASRSTLHRFGNTSSSSIWYELAYIEAKGRMKKGNKVVQIALGSGFKCNSAVWVALSNVKASTNSPWEHCIDRYPVQID : 491
CAD90159 : IDVEASRSTLHRFGNTSSSSIWYELAYIEAKGRMKKGNKVVQIALGSGFKCNSAVWVALNNVKASTNSPWEHCIDRYPVKID : 491
AF490461 : IDVEASRSTLHRFGNTSSSSIWYELAYIEAKGRMKKGNKVVQIALGSGFKCNSAVWVALNNVKASTNSPWEHCIDRYPVKID : 491
AF490460 : IDVEASRSTLHRFGNTSSSSIWYELAYIEAKGRMKKGNKVVQIALGSGFKCNSAVWVALNNVKASTNSPWEHCIDRYPVKID : 491
ACB55612 : IDVEASRSTLHRFGNTSSSSIWYELAYIEAKGRMKKGNKVVQIALGSGFKCNSAVWVALNNVKASTNSPWEHCIDRYPVKID : 491
AF274750 : IDVEASRSTLHRFGNTSSSSIWYELAYIEAKGRMKKGNKVVQIALGSGFKCNSAVWVALNNVKASTNSPWEHCIDRYPVKID : 491
NP_195178 : IDVEASRSTLHRFGNTSSSSIWYELAYIEAKGRMKKGNKVVQIALGSGFKCNSAVWVALNNVKASTNSPWEHCIDRYPVKID : 491

```

```

          500
FAE1-E1 : SDSEAKSETRVQNGRS : 506
FAE1-E2 : SDSEAKSETRVQNGRS : 506
FAE1-E3 : SDSEAKSETRVQNGRS : 506
CAD90159 : SDSEKSETRVQNGRS : 506
AF490461 : SDSEKSETRVQNGRS : 506
AF490460 : SDSEKSETRVQNGRS : 506
ACB55612 : SDSEKSETRVQNGRS : 506
AF274750 : SDSEKSETRVQNGRS : 506
NP_195178 : SDSEKSETRVQNGRS : 506

```

**Supplemental Figure 1. Alignment of amino acid sequences encoded by the *FAE1* alleles  $E^1$ ,  $E^2$  and  $E^3$  of yellow mustard, CAD90159 of *B. juncea*, AF490461 of *B. rapa*, AF490460 of *B. oleracea*, ACB55612 and AF274750 of *B. napus* and NP\_195178 of *Arabidopsis*.**

The amino acid sequence alignment was carried out using the ClustalW program (<http://www.ebi.ac.uk/Tools/msa/clustalw2/>). Conserved cysteine and histidine residues are indicated by a diamond and a triangle, respectively.

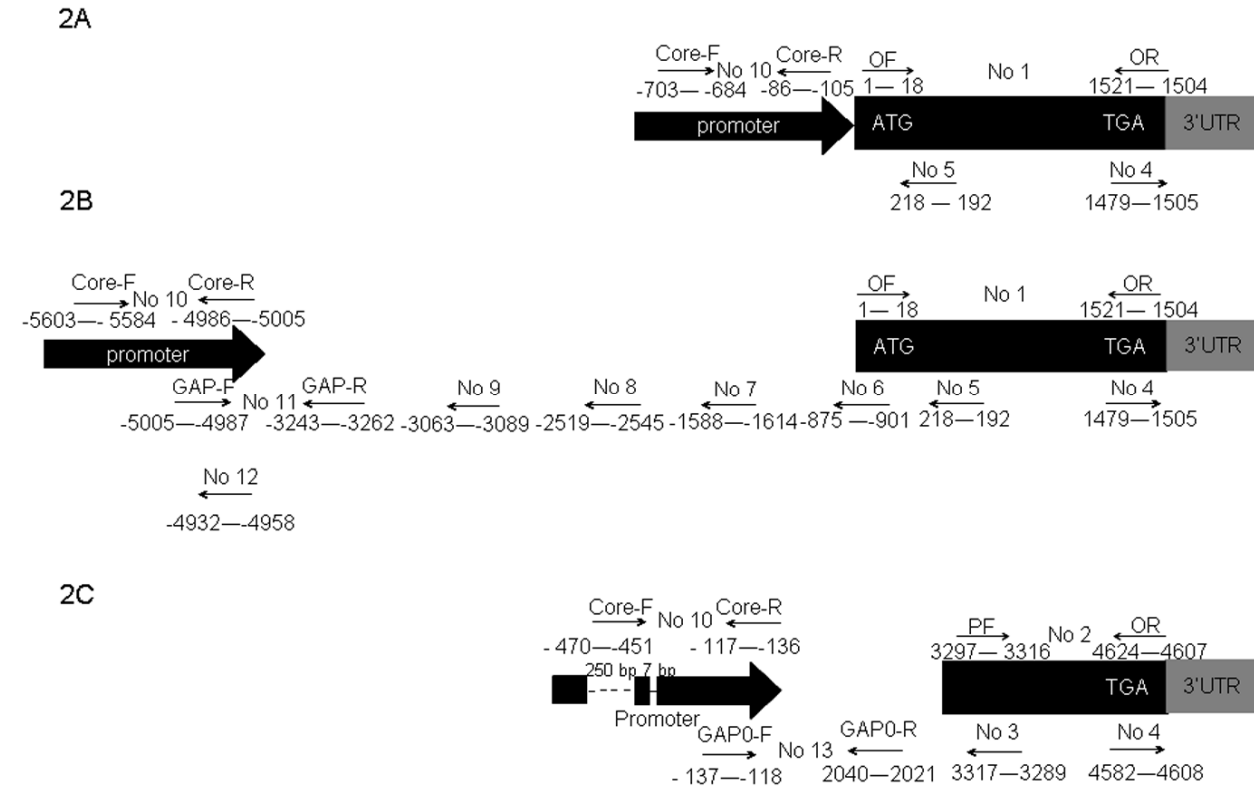

**Supplemental Figure 2. Schematic diagram showing the position of each primer used for cloning of the *FAE1* alleles  $E^1$ ,  $E^2$ ,  $E^3$  and  $e$ .**

**(A)** Primers used for cloning the *FAE1* allele  $E^1$ . **(B)** Primers used for cloning the *FAE1* allele  $E^2$  and  $E^3$ . **(C)** Primers used for cloning the *FAE1* allele  $e$ . Arrows indicated the direction of the primers. The number under each arrow indicates its nucleotide position. The “A” of translation start codon ATG represents the first nucleotide.

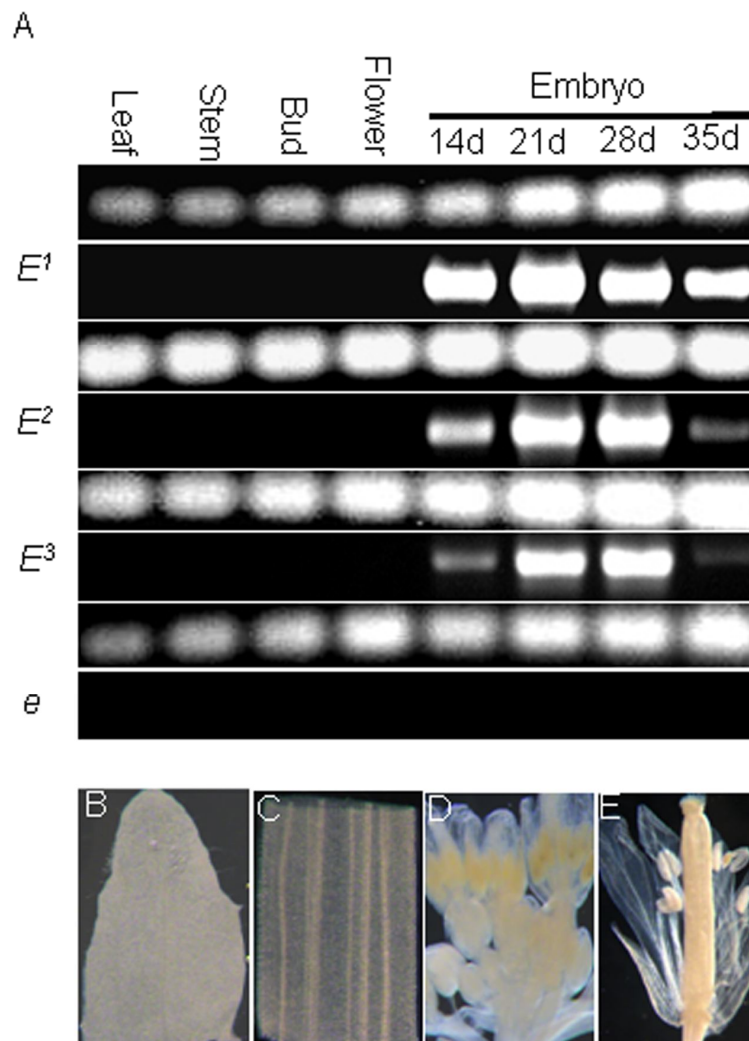

**Supplemental Figure 3. Expression pattern of the *FAE1* alleles  $E^1$ ,  $E^2$  and  $E^3$ .**

(A) The *FAE1* alleles  $E^1$ ,  $E^2$  and  $E^3$  were expressed in 14-35d old embryos, but not in the vegetative tissues of leaf, stem, bud and flower as revealed by RT-PCR. The *FAE1* allele  $e$  was not expressed in the embryo or vegetative tissues. Actin (FG576123) was used as an internal control. (B-E) GUS activity was not detected in leaf (B), stem (C), bud (D) or flower (E) of transgenic *Arabidopsis* plants containing the construct pBI101 Pro $E^1$ -GUS with the promoter of the *FAE1* allele  $E^1$ .

Supplemental Data. Zeng and Cheng (2014). Plant Cell 10.1105/tpc.114.126631

TATTACGATATATGTTATATCGTATATTCTATGCACTCGATAATATTAACCTTCCTATT  
GTTTAGCTAGAGATAAGTATAGTTTCCTATTTATCGACAGAAAGGTTTATACTAAAC  
CGTCATAGAAGCTTGTATATAATGCAAAGTTAGCATAACTTAATAAACAAGTCAGTTT  
GATATCTTATTCTACA**TGGTATCAGAGCTGA**GATCTCTTTGATTCTCTTGCTTAAAAT

PBS

CGAGTTCTTGTTCAAAGTTTGAACAAATTGTCTATCGTCGGTGACG**ATG**TCTGTCTGA  
AAGTTCTGAAGTTAAGAACACACCCGAGAAGAGTACGAGAGATGTATCGTCTCTTC  
CATCCCCGTACATCTTGTATGGTCCGATAATCCCGGAGCCATGATTACTCCAGTC  
ATGTTGAACGGAGAGAAGTACAATCAATGGGCTAACGAGATGCTTAATGCGCTTCA  
AGCCAAGCGCAAGGTCTGCTTCATCAACGAACTTTGAAGAAACCTGCAACAGAC  
GATCCAGACTATGATAATTGGGTAGCAGTGAATTCTATGATTATCGGTTGGATACG  
AGCATCTATTGATCCAAAGATAAAGGCGTCTGTGACGTTTGTAAAGCGAGGCGAGTT  
TGTTGTGGACGGATTGAAGCAGCGGTTCTCGGTTGGGAACAAAGTTCGTATTCAT  
CAAATCAAAGCACAGCTGGCAGCCTGTCGACAGGAAGGTCAAAGTGTGCTTGAAT  
ACTATGGgAAAGTTGTGCACTCATTGGGAAGAACTCGACGTCTATCGACCTCTGCC  
AATGTGTACGTGgTgGGGGCTGCTAAAGATATCAGAAAGGAAAGAGACGATGACAA  
GGTCCACCAGTTCATAaTGGGTCTTGATGACTCACGTTTGGGAGTCTTTGTACGT  
CTCTAATCGGCATGGATCCCCTGCCATCGATCGGAGAAGTCTACTCCAAGGTAGTT  
CAAGAAGAACAAGGTTGAGTAcTTCACGAAACAGAGAACAGCAGCAAGAGGTG  
ATAGGTTTTCGTTGCTCGCAGTGACAATCAAATCAAGAAACATCAATTCTCCGAAAC  
AGAGATCGTGTGACAATTTGTTCACTGTGGACGTCGAGGTCATGATAAGAAGGA  
TTGCTGGCAGATCATTGGCTTTCCGGAGGGGTGGAATGAACGTACGGACCGTGGC  
GGTTCTGTTCTGTTGGCAGAGGTCGCGGTGGACGCAACACAGGCACAGTTGGACGC  
GGCAGAGGCCAAGTAGCAGCAGCACACGCCACCAGCTCCAACCTTTCTGCCTTTC  
CAGATTTTACACCGGACCAGTGGAAGTTCTGACTCAACTGATACAAGAGAAATCA  
GGTTCAGACAAGCTATCTGGTAAGGACAAATATGGCGACGTTATTTTCGATACTGG  
GGCTTCTCACCACATGACCGGGAAGCTTTCTCTTTGAAAAATCTTGTCTCCATACC  
ACCTTGTTCCGTGGGTTTCGCAGATGGGAGTCGAACATTTGCCTTGAGTATGGGC  
GATCTTCCACTGTCAGGAAGAGTGTGCTTAACATAATGTTCTATATGTGCCATCCTTG  
AACTGCACTTTGATATCGGTTGCGAAGTTTTTAAACAACAAGCTGTCTTGCAACC  
TTTACTGATGCTGTTTGTATTTTACAGGACCGTTTCTCGAGGACTCTGATTGGAACC  
GGTGAAGAGCGTGGTGGGTTTACTACTTAACAGATGTGGCTACAGCAAAGATAC  
ACACAGTTGACGCATCTTCTGACCAATCACTGTGGCATCAGCGTTTAGGGCATCCT  
AGTTTTTCTGTGCTTTCGTCTTACCTTTGAGTTTTTCTATCAATAAAAGCTCGCGTT  
CTTGACGTATGTTTTCGAGCTAAACAAGCTCGTGAGATTTTTCCAGACAGTATTA

ATAAATCAGATGATTGTTTTCTCTAATTCATGTCGATGTCTGGGGTCCATACCGTG  
TACCTTCTTCTTGCGGTGCAGTATATTTCTCACGATTGTAGATGATTACTCCAGAT  
CAGTTTGACTTACCTAATGTTGGAGAAATCAGAAGTTAARACCATTCTTAAAACT  
TCATTGCATACGCAGAAAAACAGTTTGGCAAAGAAGTTAAGATGGTCCGAAGCGAC  
AATGGCACAGAggcATTTATGTGtTCTCTCTCAGTATTTTCGTGAAATCGGTGTCATT  
CAiTCAGACCTCATGTGTTGGCACTCCGCAGCAGAATGGTCGTGTCGAGCGCcAAG  
CACAGGCATATTCTTAACGTGGCACGTgGCGTTACTGTTTCAGGCAAGCTTACCGA  
TAAGCTTTTGGGGTGAAGCTATTTTAACAGCAGCGTATCTTATAAATCGGACACCTA  
CATCACTTCACAACGGTCGTTACCCTATGAAGTTCTTCACGGGTCTAAACCAGA  
TTACACACAGCTACGTGTCTTTGGgTTCGGCTTGCTATACTCATCGAGTCACAAGAA  
GCAAAGACAAGTTTGGTGAGAGAAGTCGCCTTTGTGTGTTTGTGGATATCCTTTT  
GGGAAAAGGGATAaCAAAGTTTATGATATGGAACGAGGGGAGTTCATTACTTCTC  
GTGATGTTGTGTTTCGAGAGGATGgTGTTCATATGCTACAAAATCTGTACCGGCT  
ACCACAACAATCCCGGTGGTAGCAAGCGATGgATGAGGACTgGGAGTTTACTGTT  
CCTCCAGTTCTGGTGGACTTGATCGATAGGGGGAGCTTGGCTGGTGTACCCCTA  
CAACTGATTCACCCGTTAACACAGCCAGTGGCAGTGAGAATTTATCACCTTTAGCC  
GACGAGAGTGATGATATTGATGAAGAAGTYACAACAGGAGCAGCTGATTTAACAGA  
TGATACGAGTGGTTCAGAAACAGTAAACGAAGCTCTTGGTCGTGGTAGAAGACAC  
GCGGTTCCCTCTGTAAAGCTCAAGGACTATGTCACCTACAATGCAGAAGCACACGC  
CTTAAGTACCCACCACGCTCACACCATCTCTGTTCCCTCAGTCCTCGTCTTCGGTCC  
AAGGTAACACACTCTACCCTTTGACAAAATTCGTGTGTGACTCTAATTTTTCTCCAC  
AGCAGCAAGCTTTCTTAGCTGCAATTACAGCCGGCGTTGAACCCAAGCATTTTAAG  
GAAGCTGTTGGGATTGATGTGTGGGATAATTCTATGGTCGACGAGATTGTTGCTCT  
TGAAGGACAACATACGTGGGATATTTGTGATCTTCCTCTCAACAAAATGCGCTTG  
GAAGCCAATGGGTCTATAAAATCAAATATAACTGACGGTACTATTAGACGTCATA  
AGTCTCGCGTTGTTGTCATGGGAAATAACAAGTAGAAGGAGAAGATTATAACGAA  
ACCTTTGCTCCAGTGGTTAAGATGACGACCGTCCGTATGTTTCTGCGTCTAGTCGC  
AGCCAATCAATGGGAAGTGTTTCAGATGGATGTCAACAACGCATTTCTCCATGGTG  
ATCTCGACGAGGAAGTATATATGAAACTCCCACCTGGGTTTCGCCACTCTCATCCA  
AATAAAGTTTGTGACTCCGGAAAAGTTTGTATGGGCTCAAGCAAGCTCCACGATG  
TTGGTTTAAAAGCTCTCTGACGCCCTGCTCAAGTTCGGTTTCTGTGAGTCCTACG  
ATGACTACTCATTATTCTCATACACTCGTAAAGGCATTGAGCTCCATGTGCTGATTT  
ATGTTGATGATCTGCTCATCAGTGGTAATGATAGACACATGGTACAAAGGTTCAA  
GACTACTTGGGAAAATGTTTTCTATGAAGGATCTTGGCAAACCTCAAGTATTTTCTA  
GGCATTGAGGTCAGTCGAGGGCCAGAAGGAATATTTCTCTCTCAAAGAAAGTATGC  
CTTAGACATTATAGCTGAAACAGGAAATCTCGGTTGCAGACCGGCTGCTACTCCGC  
TCGAACAAAACCATCAACTTGGCAAAGTCGAGAGTCCAGTGCTTGGAGACCCCA  
CAAGTATCGGAGGCTCGTAGGTCGTCTGCTCTATCTTGTTACACACCAGACCTGAGT  
TAAGTTATTCGGgTTCATGTTTTGTACAGTATATGCAGACTCCGAAAGAAGCTCAC  
TGGGATGCAGCTCAACGAGTTGTGCgGGTTTTTAAAAGGCTCACCTGGACAAGGC

ATTATGTTAAGTTCGTCTACTGACTTGTCTTTAACAATTTACTGCGATTCTGATTGGT  
 CTTCTGTCCCTCCACTCGCCGGTCACTCAGTGCGTTTGTAGCCATGCTTGGAGAC  
 TCGCCTATCAGTTGGAAAACGAAGAAGCAGGACACAGTATCTCACTCTTCCGCAGA  
 AGCCGAGTATCGAGCTATGTCTGATGCTCTTAAAGAGGTTAAATGGTTGCGTAAGT  
 TGTTACATGGATTGATATCAAACAAGTCTCTACCCGCTTCTTCTGTGACAGCAAAG  
 CAGCAATTTACATCGCCACTAACCCTGTCTTCCATGAACGTAATAACATGTTGAAA  
 ATGACTGTCATGCGGTTTCGTGATGCTGTTTCGAGATGGTCTCATTATTCTTCATCACA  
 TACGAACAAATGAGCAGATTGCGGACATTCTGACAAAGGCATTGGGACGAGCTCA  
 GTTCACTACTCTACTGTCCAAGTTGGGCGTTTGTGATCTTCACGCTCCAACGTGAG  
GGGGAGTATTACGATATATGTTATATCGTATATTCTATGCACTCGATAATATTAACTT  
 PPT  
 TCCTATTGTTTAGCTAGAGATAAGTATAGTTTCCTATTTATCGACAGAAAGGTTTATA  
 CTAACCCTCATAGAACTTGTATATAATGCAAAGTTAGCATAACTTAATAACAAGT  
 CAGTTGATATCTTATTCTACA

**Supplemental Figure 4. DNA sequence of the retrotransposable element Sal-*T1* inserted in the 5' UTR of the *FAE1* alleles *E*<sup>2</sup> and *E*<sup>3</sup>.**

The long terminal repeats (LTR) was highlighted in red. The motifs representing the primer binding site (PBS) and polypurine tract (PPT) are underlined, and highlighted in green and pink, respectively. Sequence annotation of the transposable element Sal-*T1* was predicted using GenScan at GeniusNet (<http://genome.dkfz-heidelberg.de/cgi-in/GENSCAN/genscan.cgi>). The start codon (ATG) and stop codon (TGA) are in red type. The open reading frame is highlighted in grey.

Supplemental Data. Zeng and Cheng (2014). Plant Cell 10.1105/tpc.114.126631

MSVESSEVKNTPEKSTRDVSSLPS **PYILYGSDNPGAMITPVMLNGENYNQWANEMLN**  
**ALQAKRKVCFINETLKKPATDDPDYDNWVAVNSMIIGWIRASIDPKIKASVTFVSEASLL**  
**WTDLKQRFSVGNKVRHQIKAQLAACRQEGQSV**LEYYGKVVHSLGRTRRLSTSANVY  
VVGAAKDIRKERDDDKVHQFIMGLDDSRFGSLCTSLIGMDPLPSIGEVYSKVVQEEQR  
LSTFTKQRTAARDFTPQWKVLTQLIQEKSGSDKLSGPFLESDWNRLHTATCLWVR  
LAILIESQEAKTSLVREVAFVCLLDILLGKRDNKVYDMERGEFITSRDVVFREDGVSICY  
KICTGYHNNPGGSKRWMRTGSFTVPPVLVDLIDRGSAGVTPTTDSPVNTASGSENLS  
PLADESDDIDEVTTGAADLTDDTSGSETVNEALGRGRRHAVPSVKLKDYVTYNAEAH  
ALSTHHAHTISVPQSSSSVQGNTLYPLTKFVCDNFSPQQQAFLAAITAGVEPKHFKEA  
VGIDVWDNSMVDEIVALEGQHTWDIC **DLPLNKTALGSQWVYKIKYNTDGTIRRHKSRV**  
**VVMGNKQVEGEDYNETFAPVVKMTTVMFLRLVAANQWEVFQMDVNNAFLHGDLDE**  
**EYMKLPPGFRHSHPNKVCRLRKSLYGLKQAPRCWFKKLSDALLKFGFCQSYDDYSL**  
**FSYTRKGIQLHVLIYVDDLLISGNDRHMVQRFKDYLGKCFSMKDLGKLYFLGIEVSRG**  
**PEGIFLSQRNICRLRKKLTGM**QLNELCGFLKGSPGQGIMLSSSTDL **SLTIYCDSDWSSC**  
**PSTRRSLSAFVAMLGDSPISWTKKQDTVSHSSAEAEYRAMSDALKEVKWLRKLLHG**  
**FDIKQVSTRFFCDSKAAIYIATNPVHERTKHVENDCHAVRDAVRDGLIILHHIRTNEQIA**  
**DILTK**ALGRAQFTTLLSKLGVCDLHAPT

**Supplemental Figure 5. The 959 amino acids of the deduced protein of the retrotransposable element Sal-71 predicted using GenScan at GeniusNet (<http://genome.dkfz-heidelberg.de/cgi-in/GENSCAN/genscan.cgi>).**

The putative locations of gag integrase, reverse transcriptase and RNase H are highlighted in green, yellow, and red, respectively.



**GAGCACCTCATC**GCTGGTGCTTAGGGGATTGCTTAACCTAATTTTGTGTTTAAAT  
TAAATAAAAAGCCAATTAACCTTAAGCTTCGTTGCCTAATTAAGCGCATGAAGCAA  
CCGTGTTTTTGGACACGTGTCATGACGAGAGACGAGAGAGGAGGGTGAAGTCGAC  
TCGTCTCcATTCTGctTTCgtTctTTCTCTCTCTCTCCCGTCTTCTCTCCCACGAAGG  
CGATGTGTCTCTC**TCACCGTGGCTCGTCGACGgAGACGGCGACCGGTCA**tTCTGTC  
TCGGTGTGGTTCGTCGACGACATGGTCGATGA**tGTCTT**CCTCACTGTGGGTCTCAT  
CGTGGGCGGTGGACCGGTAAATCGTTGTTGCCTTTCCGCGAATCTGAAGGTAAAG  
ATGATTTTGTTCGGTTTTATCATGCATGTCTTAGATTAGTGTGGTCTTGGTCTA  
ATCGATGTTTTTTTTCTTTCTCTGTTTCGATGATGTCTCTCACAACGGCGAAGGA  
GGAGCTCGATGATGTCTCTCACAACGGCGAAGGAGGAGCTCGATGATGGTGGGT  
CTCCGGTGTCTCGTATCGGTCTGGTAAAGCTTCGTCTTTACTTCTTTCACTTTG  
ATTCTTCTTTCAATTATTTGTTAAATCGATGTATATTCTTTTATGTTGATTCTTTG  
ATTTGTTTCTGACTTTTTGTGGTGAGCTGGAGTGATCAAATCGCTGTCTCTTGTTC  
GGTGTTAAGAGACGTCAGGAAGGTTCA**TCGAACAGAGGAGTTCAATAAGTTCACA**  
GGTCAGTGTGTCCTCTTTGGTTGTCTAATGAAATGAATGGAATTGAATTAGCTTGT  
GTTTGAATTGAATTAGCTTCTGGTAAGAATAGAATTAGCTTCTGGTTATGTATGAA  
ATTAGCTTCTGCTTGTGTATGAAATTAATAGAACTTGTGTTGGTTGTGTGATGAAT  
GCATTGGTTAAATGGATGTCATGTCGTTAGGTTGTTGGTTGTGTGATGAATGCATA  
GGTAGTTGTGTGATGAATGTTTCATCTTAAATGGATG**wCAAGTCCTTCATCTCTTC**  
TTCTCTTTATTACTTCTTCTTCTTCTCTCTCCCGAATCACTCTACATTCTGGA  
TCTTTACTTCTTCTATCTTTTCTTCTTCTCTCCCTTCCCATTCTCCTCAAATGGATT  
CTACTCcCcATTGCGTACAATGCAAATTTGTTGAGCTTCTTAATAGCCAACAAGATA  
GTGATTTTCGTTAGTAGAAGCTACTGTCGAACCAAGTTCATGAGCAGTGTCTGG  
CACCTTTTGAAGGTGATTTTGTTCCTTTGTGTCAAGGT**CAT**GTCATGTATTTTGT  
GAGTCACTTGGAGTCACTTGGAGTCAGTTGGAGTCATGTGTTTTGATCAATTGTGT  
CACGGACTGTCCTTGGAGTCCCTTCTCCTTATGTAATTTGYAATCTAATTTGTTTGT  
TAATATTGTGTCACGGATTTAGTTGTTATGTATGTTGATGTACTATAAATTATTATC  
AACTTCTTCTCTTTTCTCATCAATAGCAAAGCCAAATCATATCCTCTCTTCTCTCA  
CCATTACCAAACCGAAATCATCTCTTCTCTTTTATCCATCTCCAAGATTCAAATAAAA  
AAAAGT**ATGTCTTCTTCTTCTGAAAATACTTTGAAGATTTATTTGATGATGCATTTG**  
**ATCAATATTTGATCAAACCTTTGAAAAATTTACCATGGGTCATCAAGAAGAACCAA**  
**GGAAACwAAAAAAAAAAGAGAGCTTATATTGAAAGAAATCGTGAAGAAGGCCATATT**  
**CGATTATGGATCAGTCTCTCTCCCTTCAAAGGTGTA**CTG**CAGCCATCCGTGTCTT**  
**GGCATATGGTTGTGCGGGTGATATGGTCGACGAATACCTTCGGCTCGGTGAAACA**  
**ACA**ACTCGTTTATGTGT**CGAAAATTTGTGGAAGGCGTAATTAATTTGTT**CGGCGAT****

GAGTACTTAAGAAGACCAACCCCGACTGATCTTCAACGtTTACTTGATGTTGGGGA  
GTATCGTGGATTTCCCGGGATGATAGGAaGCATCGATTGTATGCATTGGGAGTGGA  
AGAATTGTCCAACcCGCTTGAAAGGACAATATTCTCGTGGTTCGGGCAAACCTACT  
ATCGTTTTAGAGGCGGTTGCTTCGTATGATCTCTGGATATGGCATGCGTTTTTTGG  
ACCTCCAGGTACCTTAAATGATATCAACGTTCTTGATCGTTCACCTGTTTTTGATGA  
CATAACATGGTCAAGCTCCGCCAGTCACTTTCTCTGTCAATGGAAGACAATATC  
ATATGGCTTACTATCTGACTGATGGTATTTATCCGAAATGGGCAACTTTTATCCAAT  
CTATTCGTTTACCACAGGTGCCGAAAGCAGTTTTATTTGCTCAACGTCAAGAGGCT  
GTCCGAAAAGATGTCGAGCGTGCTTTTGGAGTCTACAAGCTCGTTTTTGCAATTGT  
TAAAATCCAGCTCTGTTCTGGGATAAAGTCAAATTGGGAAAATTATGAGAGCAT  
GTATCATACTCCATAATATGGTAGTAGAAGACGAACGAGATGGATACACTCAATAT  
GATGTTTCAGAGTTCGTCCAAGGAGAAGAAAACCGAAGTTCTCATGTGCGATCTCGA  
TTTTGATAGAGATATCCCATCAAATATCGCAAATACAATGGATGCTCGAACAAAGAAT  
TCGTGATAAACCAATGCATCAACAACATAAAACATGATTTAGTTGAACATATATGGCA  
TAAGTTTGGAGGTGATGAAGACAACAACTAACTGAGATGGATCTTTCAAATAATTCT  
CATGTATTTTCTAGTCTTTTGTTCATGTTTTTTTTTTAAACTATGTTTGAATATTGT  
CTTGAATAAATTTTAAGTTTTCTATAATAAATTTTAAGTTAAAAAATAAATAAAAT  
TTAAAATTGTTAAAATAAGCAACTTGCAATGGAAAAATAAAATTAACAAATTGCTTAG  
CTAAGTTGCTTAACCCAAATAAATTATTAATACTATTAATTTTTTAATTAAGCAaCCCA  
TAATGGGtGTTAGGATGAGGGTGCTC

**Supplemental Figure 6. The sequence of the DNA transposon Sal-PIF inserted in the coding region of the *FAE1* allele e.**

Sequence annotation of DNA transposon Sal-PIF was predicted using GenScan at GeniusNet (<http://genome.dkfz-heidelberg.de/cgi-in/GENSCAN/genscan.cgi>). ORF1: highlighted in grey; ORF2: highlighted in light blue. The start codon (ATG) and stop codon (TAA, TGA) are underlined. The terminal inverted repeats (TIRs) are highlighted in red.

Supplemental Data. Zeng and Cheng (2014). Plant Cell 10.1105/tpc.114.126631

7A

MTLTQKKQNTPSKRRIKVKRSKRRSFTRPIRGHRRPTIIELLLRRCERHHRAPPSPLFA  
ERQQRFTGPPPTMRPTVRKTIIDHVDDKHRDRMTGRRLRRRAT

7B

MSSSENTFEDLFDDAFDQYFDQTFEKFTMGHQEPRKXKKKRAYIERNREEGHIRL  
WISLSPLQKCTAAIRVLAYGCAGDMVDEYLRLGETTTRLCVENFVEGVINLFGDEYLRR  
PTPTDLQRLLDVGEYRGFPGMIGSIDCMHWEWKNCPTAWKGQYSRGSKGPTIVLEAV  
ASYDLWIWHAFFGPPGTLNDINVLDLRSPVFDDIIHGQAPPVTFVNGRQYHMAYYLT  
GIYPKWATFIQSIRLPQVPKAVLFAQRQEAVRKDVERAFGVLQARFAIVKNPALFWDKV  
KIGKIMRACIILHNMVVEDERDGYTQYDVSEFVQGEENRSSHVLDLDFDRDIPSNIANTM  
DARTRIRDKPMHQQLKHDLVEHIWHKFGGDEDNN

**Supplemental Figure 7. Deduced amino acid sequences of the DNA transposon *Sal-PIF* predicted using GenScan at GeniusNet (<http://genome.dkfz-heidelberg.de/cgi-in/GENSCAN/genscan.cgi>).**

(A) The 103 amino acids of the deduced protein of ORF1. (B) The 383 amino acids of the deduced protein of ORF2.

Supplemental Data. Zeng and Cheng (2014). Plant Cell 10.1105/tpc.114.126631

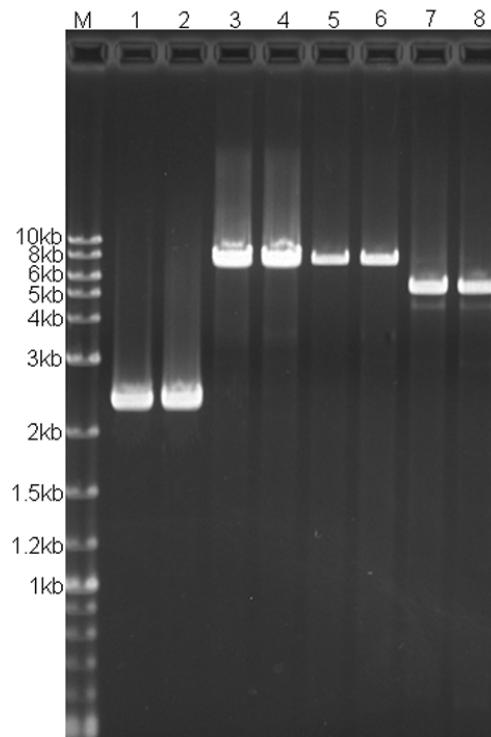

**Supplemental Figure 8. PCR amplification of the entire *FAE1* alleles  $E^1$ ,  $E^2$ ,  $E^3$  and *e* using the primer pair WF/WR No 14 (Supplemental Table 1 online).**

M: 1 kb DNA ladder; Lanes 1 and 2: 2524 bp fragment of  $E^1$ ; Lanes 3 and 4: 7424 bp fragment of  $E^2$ ; Lanes 5 and 6: 7424 bp fragment of  $E^3$ ; Lane 7 and 8: 5369 bp of *e*.

Supplemental Data. Zeng and Cheng (2014). Plant Cell 10.1105/tpc.114.126631

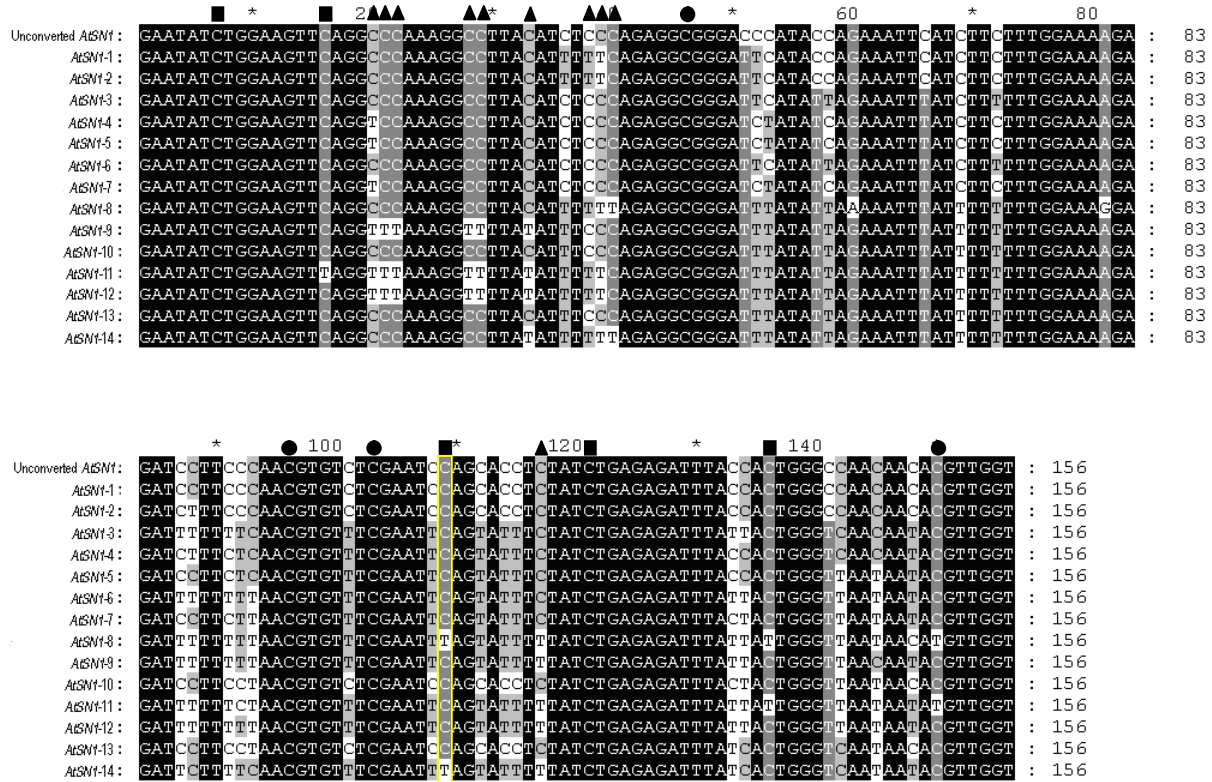

**Supplemental Figure 9. DNA methylation in the internal region between the long terminal repeats of *AtSN1* (positive control).**

The known eighteen methylated cytosines as reported by Kuhlmann and Mette (2012), and one additional methylated cytosine (highlighted as yellow) were detected in the internal region between the long terminal repeats of *AtSN1* (positive control). Circle: CG; Rectangle: CHG; Triangle: CHH.

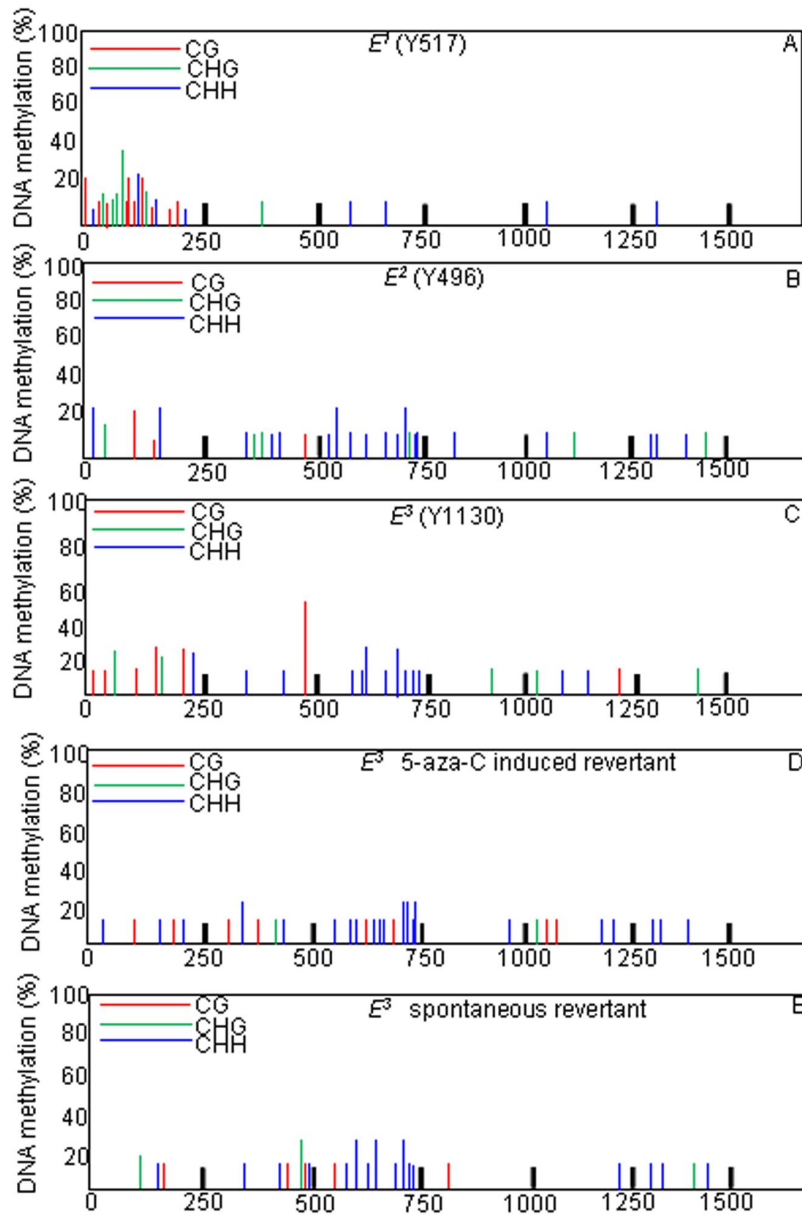

**Supplemental Figure 10. DNA methylation in the coding regions of the *FAE1* alleles  $E^1$ ,  $E^2$  and  $E^3$ .**

DNA methylation was not detected in the 1515 bp coding region (nucleotides 1-1515) of  $E^1$  in Y517 (A),  $E^2$  in Y496 (B) and  $E^3$  in Y1130 (C),  $E^3$  in 5-azaC induced revertants of Y1130 (D) and  $E^3$  in spontaneous revertant of Y1130 (E).

11A

```

Unconverted ATP1 : TGAATGAGATTAAAGCTGGGAAATGTTTCTTTTTGCCAACGGTGTGAAAGGAATGCCCTTGAATCTTGAGAATGAGAATG : 81
ATP1-Y517-1 : TGAATGAGATTAAAGCTGGGAAATGTTTCTTTTTGTAAAGGTGTGAAAGGAATGGTTTGAATTTTGAGAATGAGAATG : 81
ATP1-Y517-2 : TGAATGAGATTAAAGTGGGAAATGTTTCTTTTTGTAAAGGTGTGAAAGGAATGGTTTGAATTTTGAGAATGAGAATG : 81
ATP1-Y517-3 : TGAATGAGATTAAAGTGGGAAATGTTTCTTTTTGTAAAGGTGTGAAAGGAATGGTTTGAATTTTGAGAATGAGAATG : 81
ATP1-Y517-4 : TGAATGAGATTAAAGCTGGGAAATGTTTCTTTTTGTAAAGGTGTGAAAGGAATGGTTTGAATTTTGAGAATGAGAATG : 81
ATP1-Y517-5 : TGAATGAGATTAAAGTGGGAAATGTTTCTTTTTGTAAAGGTGTGAAAGGAATGGTTTGAATTTTGAGAATGAGAATG : 81
ATP1-Y517-6 : TGAATGAGATTAAAGTGGGAAATGTTTCTTTTTGTAAAGGTGTGAAAGGAATGGTTTGAATTTTGAGAATGAGAATG : 81
ATP1-Y517-7 : TGAATGAGATTAAAGTGGGAAATGTTTCTTTTTGTAAAGGTGTGAAAGGAATGGTTTGAATTTTGAGAATGAGAATG : 81
ATP1-Y517-8 : TGAATGAGATTAAAGTGGGAAATGTTTCTTTTTGTAAAGGTGTGAAAGGAATGGTTTGAATTTTGAGAATGAGAATG : 81
ATP1-Y517-9 : TGAATGAGATTAAAGTGGGAAATGTTTCTTTTTGTAAAGGTGTGAAAGGAATGGTTTGAATTTTGAGAATGAGAATG : 81
ATP1-Y517-10 : TGAATGAGATTAAAGTGGGAAATGTTTCTTTTTGTAAAGGTGTGAAAGGAATGGTTTGAATTTTGAGAATGAGAATG : 81
    
```

```

Unconverted ATP1 : TCGGGATTGTTGTTTGGTGGTGATACCCCTATAAAAAGAGGAGATCTTGTCAAGCCACTGGATCTATTGTGGATGTTT : 162
ATP1-Y517-1 : TCGGGATTGTTGTTTGGTGGTGATATTGTTATAAAAAGAGGAGATTTTGTAAAGTGTATTGGATTTATTGTGGATGTTT : 162
ATP1-Y517-2 : TCGGGATTGTTGTTTGGTGGTGATATTGTTATAAAAAGAGGAGATTTTGTAAAGTGTATTGGATTTATTGTGGATGTTT : 162
ATP1-Y517-3 : TCGGGATTGTTGTTTGGTGGTGATATTGTTATAAAAAGAGGAGATTTTGTAAAGTGTATTGGATTTATTGTGGATGTTT : 162
ATP1-Y517-4 : TCGGGATTGTTGTTTGGTGGTGATATTGTTATAAAAAGAGGAGATTTTGTAAAGTGTATTGGATTTATTGTGGATGTTT : 162
ATP1-Y517-5 : TCGGGATTGTTGTTTGGTGGTGATTTTCTTATAAAAAGAGGATTTTGTAAAGCCCTCGGGCTTTTGTGCAATGTTT : 162
ATP1-Y517-6 : TCGGGATTGTTGTTTGGTGGTGATATTGTTATAAAAAGAGGAGATTTTGTAAAGTGTATTGGATTTATTGTGGATGTTT : 162
ATP1-Y517-7 : TCGGGATTGTTGTTTGGTGGTGATATTGTTATAAAAAGAGGAGATTTTGTAAAGTGTATTGGATTTATTGTGGATGTTT : 162
ATP1-Y517-8 : TCGGGATTGTTGTTTGGTGGTGATATTGTTATAAAAAGAGGAGATTTTGTAAAGTGTATTGGATTTATTGTGGATGTTT : 162
ATP1-Y517-9 : TCGGGATTGTTGTTTGGTGGTGATATTGTTATAAAAAGAGGAGATTTTGTAAAGTGTATTGGATTTATTGTGGATGTTT : 162
ATP1-Y517-10 : TCGGGATTGTTGTTTGGTGGTGATATTGTTATAAAAAGAGGAGATTTTGTAAAGTGTATTGGATTTATTGTGGATGTTT : 162
    
```

```

Unconverted ATP1 : CCGGGGAAAAGGCTATGCTAAGGCTGTGGTGCACCCGATGGGAGTACCTATTGATGAAAGAGG : 227
ATP1-Y517-1 : TTCTGGGAAAAGTTATGTTAAGGCTGTGGTGCATCTGATGGGAGTATTTATTGATGAAAGAGG : 227
ATP1-Y517-2 : TTCTGGGAAAAGTTATGTTAAGGCTGTGGTGCATCTGATGGGAGTATTTATTGATGAAAGAGG : 227
ATP1-Y517-3 : TTCTGGGAAAAGTTATGTTAAGGCTGTGGTGCATCTGATGGGAGTACTTATTGATGAAAGAGG : 227
ATP1-Y517-4 : TTCTGGGAAAAGTTATGTTAAGGCTGTGGTGCATCTGATGGGAGTATTTATTGATGAAAGAGG : 227
ATP1-Y517-5 : TTCTGGGAAAAGGGCTATGCTAAGGCTGTGGTGCATCTGATGGGAGTATTTATTGATGAAAGAGG : 227
ATP1-Y517-6 : TTCTGGGAAAAGTTATGTTAAGGCTGTGGTGCATCTGATGGGAGTACTTATTGATGAAAGAGG : 227
ATP1-Y517-7 : TTCTGGGAAAAGTTATGTTAAGGCTGTGGTGCATCTGATGGGAGTATTTATTGATGAAAGAGG : 227
ATP1-Y517-8 : TTCTGGGAAAAGTTATGTTAAGGCTGTGGTGCATCTGATGGGAGTATTTATTGATGAAAGAGG : 227
ATP1-Y517-9 : TTCTGGGAAAAGTTATGTTAAGGCTGTGGTGCATCTGATGGGAGTATTTATTGATGAAAGAGG : 227
ATP1-Y517-10 : TTCTGGGAAAAGTTATGTTAAGGCTGTGGTGCATCTGATGGGAGTACTTATTGATGAAAGAGG : 227
    
```

11B

```

Unconverted P1 : TCAAAGAAGATCTTTGTAGTTAGAGATAGAAATCTACATACTCTTTATTTGGAGTAACAATGGAGATATTTAAGCAATGA : 81
PI-E'(Y517)-1 : TCAAAGAAGATTTTGTAGTTAGAGATAGAAATTTATATATTTTATTTGGAGTAACAATGGAGATATTTAAGTAATGA : 81
PI-E'(Y517)-2 : TCAAAGAAGATTTTGTAGTTAGAGATAGAAATTTATATATTTTATTTGGAGTAACAATGGAGATATTTAAGTAATGA : 81
PI-E'(Y517)-3 : TCAAAGAAGATTTTGTAGTTAGAGATAGAAATTTATATATTTTATTTGGAGTAACAATGGAGATATTTAAGTAATGA : 81
PI-E'(Y517)-4 : TCAAAGAAGATTTTGTAGTTAGAGATAGAAATTTATATATTTTATTTGGAGTAACAATGGAGATATTTAAGTAATGA : 81
PI-E'(Y517)-5 : TCAAAGAAGATTTTGTAGTTAGAGATAGAAATTTATATATTTTATTTGGAGTAACAATGGAGATATTTAAGTAATGA : 81
PI-E'(Y517)-6 : TCAAAGAAGATTTTGTAGTTAGAGATAGAAATTTATATATTTTATTTGGAGTAACAATGGAGATATTTAAGTAATGA : 81
PI-E'(Y517)-7 : TCAAAGAAGATTTTGTAGTTAGAGATAGAAATTTATATATTTTATTTGGAGTAACAATGGAGATATTTAAGTAATGA : 81
PI-E'(Y517)-8 : TCAAAGAAGATTTTGTAGTTAGAGATAGAAATTTATATATTTTATTTGGAGTAACAATGGAGATATTTAAGTAATGA : 81
PI-E'(Y517)-9 : TCAAAGAAGATTTTGTAGTTAGAGATAGAAATTTATATATTTTATTTGGAGTAACAATGGAGATATTTAAGTAATGA : 81
PI-E'(Y517)-10 : TCAAAGAAGATTTTGTAGTTAGAGATAGAAATTTATATATTTTATTTGGAGTAACAATGGAGATATTTAAGTAATGA : 81
    
```

```

Unconverted P1 : ATTTATGACCTATATTTATATAGTTTATTTGATTTTAAATTGAAAGCATTATTTTATCGAAATGAAATCTAGTATATAA : 162
PI-E'(Y517)-1 : ATTTATGACCTATATTTATATAGTTTATTTGATTTTAAATTGAAAGTATTATTTTATCGAAATGAAATTTAGTATATAA : 162
PI-E'(Y517)-2 : ATTTATGACCTATATTTATATAGTTTATTTGATTTTAAATTGAAAGTATTATTTTATCGAAATGAAATTTAGTATATAA : 162
PI-E'(Y517)-3 : ATTTATGACCTATATTTATATAGTTTATTTGATTTTAAATTGAAAGTATTATTTTATCGAAATGAAATTTAGTATATAA : 162
PI-E'(Y517)-4 : ATTTATGACCTATATTTATATAGTTTATTTGATTTTAAATTGAAAGTATTATTTTATCGAAATGAAATTTAGTATATAA : 162
PI-E'(Y517)-5 : ATTTATGACCTATATTTATATAGTTTATTTGATTTTAAATTGAAAGTATTATTTTATCGAAATGAAATTTAGTATATAA : 162
PI-E'(Y517)-6 : ATTTATGACCTATATTTATATAGTTTATTTGATTTTAAATTGAAAGTATTATTTTATCGAAATGAAATTTAGTATATAA : 162
PI-E'(Y517)-7 : ATTTATGACCTATATTTATATAGTTTATTTGATTTTAAATTGAAAGTATTATTTTATCGAAATGAAATTTAGTATATAA : 162
PI-E'(Y517)-8 : ATTTATGACCTATATTTATATAGTTTATTTGATTTTAAATTGAAAGTATTATTTTATCGAAATGAAATTTAGTATATAA : 162
PI-E'(Y517)-9 : ATTTATGACCTATATTTATATAGTTTATTTGATTTTAAATTGAAAGTATTATTTTATCGAAATGAAATTTAGTATATAA : 162
PI-E'(Y517)-10 : ATTTATGACCTATATTTATATAGTTTATTTGATTTTAAATTGAAAGTATTATTTTATCGAAATGAAATTTAGTATATAA : 162
    
```

```

      *           180           *           200           *           220           *           240
Unconverted P1 : TATAATGTTTTATCATCAGGATACTTTTCCTATTTTTGGCCACCTTTCATAGGACTACTGATTTATTTCAATGTGTATGCCT : 243
P1-E'(Y517)-1 : TATAATGTTTTATRATTAGGATATTTTTTTTTATTTTTGGTATTTTTRATAGGATTATTGATTTATTTAATGTGTATGTTT : 243
P1-E'(Y517)-2 : TATAATGTTTTATRATTAGGATATTTTTTTTTATTTTTGGTATTTTTRATAGGATTATTGATTTATTTAATGTGTATGTTT : 243
P1-E'(Y517)-3 : TATAATGTTTTATRATTAGGATATTTTTTTTTATTTTTGGTATTTTTRATAGGATTATTGATTTATTTAATGTGTATGTTT : 243
P1-E'(Y517)-4 : TATAATGTTTTATRATTAGGATATTTTTTTTTATTTTTGGTATTTTTRATAGGATTATTGATTTATTTAATGTGTATGTTT : 243
P1-E'(Y517)-5 : TATAATGTTTTATRATTAGGATATTTTTTTTTATTTTTGGTATTTTTRATAGGATTATTGATTTATTTAATGTGTATGTTT : 243
P1-E'(Y517)-6 : TATAATGTTTTATRATTAGGATATTTTTTTTTATTTTTGGTATTTTTRATAGGATTATTGATTTATTTAATGTGTATGTTT : 243
P1-E'(Y517)-7 : TATAATGTTTTATRATTAGGATATTTTTTTTTATTTTTGGTATTTTTRATAGGATTATTGATTTATTTAATGTGTATGTTT : 243
P1-E'(Y517)-8 : TATAATGTTTTATRATTAGGATATTTTTTTTTATTTTTGGTATTTTTRATAGGATTATTGATTTATTTAATGTGTATGTTT : 243
P1-E'(Y517)-9 : TATAATGTTTTATRATTAGGATATTTTTTTTTATTTTTGGTATTTTTRATAGGATTATTGATTTATTTAATGTGTATGTTT : 243
P1-E'(Y517)-10 : TATAATGTTTTATRATTAGGATATTTTTTTTTATTTTTGGTATTTTTRATAGGATTATTGATTTATTTAATGTGTATGTTT : 243

```

```

      *
Unconverted P1 : GCATGAGCATGAGT : 257
P1-E'(Y517)-1 : GCATGAGTATGAGT : 257
P1-E'(Y517)-2 : GCATGAGTATGAGT : 257
P1-E'(Y517)-3 : GCATGAGTATGAGT : 257
P1-E'(Y517)-4 : GCATGAGTATGAGT : 257
P1-E'(Y517)-5 : GCATGAGTATGAGT : 257
P1-E'(Y517)-6 : GCATGAGTATGAGT : 257
P1-E'(Y517)-7 : GCATGAGTATGAGT : 257
P1-E'(Y517)-8 : GCATGAGTATGAGT : 257
P1-E'(Y517)-9 : GCATGAGTATGAGT : 257
P1-E'(Y517)-10 : GCATGAGTATGAGT : 257

```

## 11C

```

      *           20           *           40           *           60           *           80
Unconverted P2 : ATTTTTTGGCCACCTTTCATAGGACTACTGATTTATTTCAATGTGTATGCCTGCATGAGCATGAGTATACACATGTCTTTTAAAA : 83
P2-E'(Y517)-1 : ATTTTTTGGTATTTTTRATAGGATTATTGATTTATTTAATGTGTATGTTTCATGAGTATGAGTATATATATGTTTTTTAAAA : 83
P2-E'(Y517)-2 : ATTTTTTGGTATTTTTRATAGGATTATTGATTTATTTAATGTGTATGTTTCATGAGTATGAGTATATATATGTTTTTTAAAA : 83
P2-E'(Y517)-3 : ATTTTTTGGTATTTTTRATAGGATTATTGATTTATTTAATGTGTATGTTTCATGAGTATGAGTATATATATGTTTTTTAAAA : 83
P2-E'(Y517)-4 : ATTTTTTGGTATTTTTRATAGGATTATTGATTTATTTAATGTGTATGTTTCATGAGTATGAGTATATATATGTTTTTTAAAA : 83
P2-E'(Y517)-5 : ATTTTTTGGTATTTTTRATAGGATTATTGATTTATTTAATGTGTATGTTTCATGAGTATGAGTATATATATGTTTTTTAAAA : 83
P2-E'(Y517)-6 : ATTTTTTGGTATTTTTRATAGGATTATTGATTTATTTAATGTGTATGTTTCATGAGTATGAGTATATATATGTTTTTTAAAA : 83
P2-E'(Y517)-7 : ATTTTTTGGTATTTTTRATAGGATTATTGATTTATTTAATGTGTATGTTTCATGAGTATGAGTATATATATGTTTTTTAAAA : 83
P2-E'(Y517)-8 : ATTTTTTGGTATTTTTRATAGGATTATTGATTTATTTAATGTGTATGTTTCATGAGTATGAGTATATATATGTTTTTTAAAA : 83
P2-E'(Y517)-9 : ATTTTTTGGTATTTTTRATAGGATTATTGATTTATTTAATGTGTATGTTTCATGAGTATGAGTATATATATGTTTTTTAAAA : 83
P2-E'(Y517)-10 : ATTTTTTGGTATTTTTRATAGGATTATTGATTTATTTAATGTGTATGTTTCATGAGTATGAGTATATATATGTTTTTTAAAA : 83

```

```

      *           100           *           120           *           140
Unconverted P2 : ATGCATGTAAAGTGTAAAGGACCCACAAAAGAGGATCTATACAAAATACATCTCATCACTTC : 143
P2-E'(Y517)-1 : ATGCATGTAAAGTGTAAAGGATTATAAAAAGAAGATTTATAAAAAATATATTTTATTTATTTT : 143
P2-E'(Y517)-2 : ATGCATGTAAAGTGTAAAGGATTATAAAAAGAAGATTTATAAAAAATATATTTTATTTATTTT : 143
P2-E'(Y517)-3 : ATGCATGTAAAGTGTAAAGGATTATAAAAAGAAGATTTATAAAAAATATATTTTATTTATTTT : 143
P2-E'(Y517)-4 : ATGCATGTAAAGTGTAAAGGATTATAAAAAGAAGATTTATAAAAAATATATTTTATTTATTTT : 143
P2-E'(Y517)-5 : ATGCATGTAAAGTGTAAAGGATTATAAAAAGAAGATTTATAAAAAATATATTTTATTTATTTT : 143
P2-E'(Y517)-6 : ATGCATGTAAAGTGTAAAGGATTATAAAAAGAAGATTTATAAAAAATATATTTTATTTATTTT : 143
P2-E'(Y517)-7 : ATGCATGTAAAGTGTAAAGGATTATAAAAAGAAGATTTATAAAAAATATATTTTATTTATTTT : 143
P2-E'(Y517)-8 : ATGCATGTAAAGTGTAAAGGATTATAAAAAGAAGATTTATAAAAAATATATTTTATTTATTTT : 143
P2-E'(Y517)-9 : ATGCATGTAAAGTGTAAAGGATTATAAAAAGAAGATTTATAAAAAATATATTTTATTTATTTT : 143
P2-E'(Y517)-10 : ATGCATGTAAAGTGTAAAGGATTATAAAAAGAAGATTTATAAAAAATATATTTTATTTATTTT : 143

```



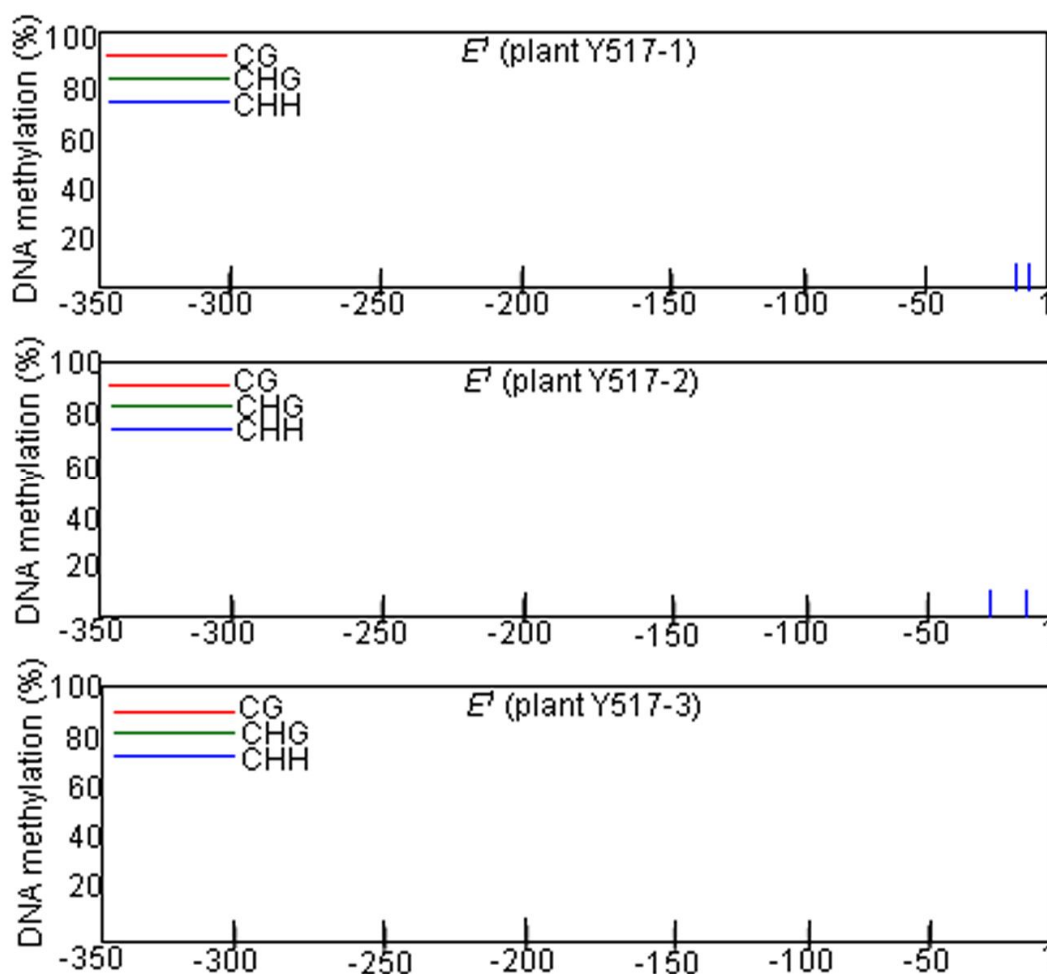

**Supplemental Figure 11. Bisulfite sequence alignment of *ATP1* (control gene) and the *FAE1* allele *E*<sup>1</sup> in line Y517.**

(A) The control gene *ATP1* had 100% conversion of C to T in the 10 clones analyzed. (B) DNA methylation was not detected in the promoter region (nucleotides -335 to -79) of *E*<sup>1</sup>. (C) DNA methylation was not observed in the partial promoter region (nucleotides -143 to 1) of *E*<sup>1</sup>. Unconverted genomic sequence is shown on the top. P1: The promoter region (nucleotides -335 to -79) was amplified using primer pair No 30. P2: The promoter region (nucleotides -143 to 1) was amplified using primer pair No 28. (D) DNA methylation was not detected in the promoter region (-335 to 1) of the *FAE1* allele *E*<sup>1</sup> in the three plants Y517-1, -2 and -3. Ten clones were analyzed for each bisulfite experiment.



```

*           180           *           200           *           220           *           240
Unconverted P1 : TATAATGTTTTATCATCAGGATACCTTTCCATTTTTTTGGCACCTTTATAGGACTACTGATTATTTCAATGTGTATGCCT : 243
P1-E(Y496)-1 : TATAATGTTTTATATAGGATACCTTTTATTTTTTTGGTATTTTTATAGGATATTGATTATTTTAAATGTGTATGTTT : 243
P1-E(Y496)-2 : TATAATGTTTTATATCAGGATATTTTTTATTTTTTTGGTATTTTTATAGGATATTGATTATTTTAAATGTGTATGTTT : 243
P1-E(Y496)-3 : TATAATGTTTTATATAGGATATTTTTTATTTTTTTGGTATTTTTATAGGATATTGATTATTTTAAATGTGTATGTTT : 243
P1-E(Y496)-4 : TATAATGTTTTATATAGGATATTTTTTATTTTTTTGGTATTTTTATAGGATATTGATTATTTTAAATGTGTATGTTT : 243
P1-E(Y496)-5 : TATAATGTTTTATATAGGATATTTTTTATTTTTTTGGTATTTTTATAGGATATTGATTATTTTAAATGTGTATGTTT : 243
P1-E(Y496)-6 : TATAATGTTTTATATAGGATATTTTTTATTTTTTTGGTATTTTTATAGGATATTGATTGAAAAAAG-GTGTATGTTT : 242
P1-E(Y496)-7 : TATAATGTTTTATCATAGGATATTTTTTATTTTTTTGGTATTTTTATAGGATATTGATT-AAAAG-GTGTATGTTT : 241
P1-E(Y496)-8 : TATAATGTTTTATATAGGATATTTTTTATTTTTTTGGTATTTTTATAGGATATTGATTATTTTAAATGGTATGTTT : 243
P1-E(Y496)-9 : TATAATGTTTTATATAGGATATTTTTTATTTTTTTGGTATTTTTATAGGATATTGATTATTTTAAATGTGTATGTTT : 243
P1-E(Y496)-10 : TATAATGTTTTATATAGGATATTTTTTATTTTTTTGGTATTTTTATAGGATATTGATTATTTTAAATGTGTATGTTT : 243

```

```

*
Unconverted P1 : GCATGAGCATGAGT : 257
P1-E(Y496)-1 : GCATGAGTATGAGT : 257
P1-E(Y496)-2 : GCATGAGTATGAGT : 257
P1-E(Y496)-3 : GCATGAGTATGAGT : 257
P1-E(Y496)-4 : GCATGAGTATGAGT : 257
P1-E(Y496)-5 : GCATGAGTATGAGT : 257
P1-E(Y496)-6 : GCATGAGTATGAGT : 256
P1-E(Y496)-7 : GCATGAGTATGAGT : 255
P1-E(Y496)-8 : GCATGAGTATGAGT : 257
P1-E(Y496)-9 : GCATGAGTATGAGT : 257
P1-E(Y496)-10 : GCATGAGTATGAGT : 257

```

## 12C

```

*           20           *           40           *           60           *           80
Unconverted P2 : ATTTTTTGGCACCTTTATAGGACTACTGATTATTTCAATGTGTATGCCTGCATGAGCATGAGTATACACATGCTTTTAAAA : 83
P2-E(Y496)-1 : ATTTTTTGGTATTTTTATAGGATATTGATTGAAAAAAG-GTGTATGTTTGTATGAGTATGAGTATATAATGTTTTAAAA : 82
P2-E(Y496)-2 : ATTTTTTGGTATTTTTATAGGATATTGATTATTTTAAATGTGTATGTTTGTATGAGTATGAGTATATAATGTTTTAAAA : 83
P2-E(Y496)-3 : ATTTTTTGGTATTTTTATAGGATATTGATTATTTTAAATGTGTATGTTTGTATGAGTATGAGTATATAATGTTTTAAAA : 83
P2-E(Y496)-4 : ATTTTTTGGTATTTTTATAGGATATTGATTATTTTAAATGTGTATGTTTGTATGAGTATGAGTATATAATGTTTTAAAA : 83
P2-E(Y496)-5 : ATTTTTTGGTATTTTTATAGGATATTGATTATTTTAAATGTGTATGTTTGTATGAGTATGAGTATATAATGTTTTAAAA : 83
P2-E(Y496)-6 : ATTTTTTGGTATTTTTATAGGATATTGATTGAAAAAAG-GTGTATGTTTGTATGAGTATGAGTATATAATGTTTTAAAA : 82
P2-E(Y496)-7 : ATTTTTTGGTATTTTTATAGGATATTGATT-AAAAG-GTGTATGTTTGTATGAGTATGAGTATATAATGTTTTAAAA : 81
P2-E(Y496)-8 : ATTTTTTGGTATTTTTATAGGATATTGATTATTTTAAATGGTATGTTTGTATGAGTATGAGTATATAATGTTTTAAAA : 83
P2-E(Y496)-9 : ATTTTTTGGTATTTTTATAGGATATTGATTATTTTAAATGTGTATGTTTGTATGAGTATGAGTATATAATGTTTTAAAA : 83
P2-E(Y496)-10 : ATTTTTTGGTATTTTTATAGGATATTGATTATTTTAAATGTGTATGTTTGTATGAGTATGAGTATATAATGTTTTAAAA : 83

```

```

*           100           *           120           *           140
Unconverted P2 : ATGCANGTAAAGTGTAAACGGACCAAAAAAGAGGATCTATACAAATACATCTCATCACTTC : 143
P2-E(Y496)-1 : AAGCATGTAAGTGTAAATGGATTAAAAAGAGGATTTATATAAATAATTTTATTTTT : 142
P2-E(Y496)-2 : ATGTATGTAAGTGTAAATGGATTAAAAAGAGGATTTATATAAATAATTTTATTTTT : 143
P2-E(Y496)-3 : ATGTAAGTAAAGTGTAAATGGATTAAAAAGAGGATTTATACAAATACATCTCATCACTTC : 143
P2-E(Y496)-4 : AAGCATGTAAGTGTAAATGGATTAAAAAGAGGATTTATATAAATAATTTTATTTTT : 143
P2-E(Y496)-5 : ATGTATGTAAGTGTAAATGGATTAAAAAGAGGATTTATATAAATAATTTTATTTTT : 143
P2-E(Y496)-6 : AAGCATGTAAGTGTAAATGGATTAAAAAGAGGATTTATATAAATAATTTTATTTTT : 142
P2-E(Y496)-7 : AGCAATGTAAGTGTAAATGGATTAAAAAGAGGATTTATATAAATAATTTTATTTTT : 141
P2-E(Y496)-8 : ATGTATGTAAGTGTAAATGGATTAAAAAGAGGATTTATATAAATAATTTTATTTTT : 143
P2-E(Y496)-9 : ACC-ANGTAAAGTGTAAATGGATTAAAAAGAGGATTTATATAAATAATTTTATTTTT : 142
P2-E(Y496)-10 : AACAAGTAAAGTGTAAATGGATTAAAAAGAGGATTTATATAAATAATTTTATTTTT : 143

```

12D

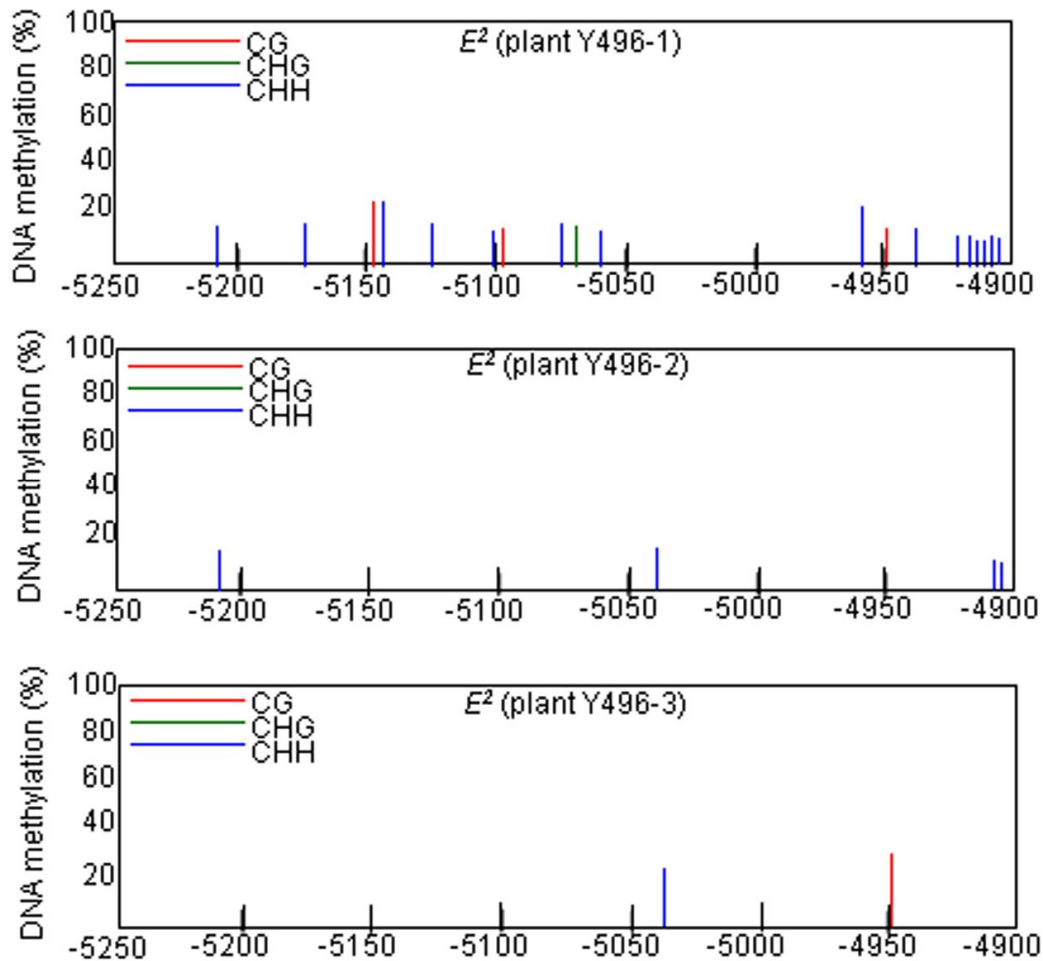

**Supplemental Figure 12. Bisulfite sequence alignment of *ATP1* (control gene) and the *FAE1* allele *E*<sup>2</sup> in line Y496.**

(A) The control gene *ATP1* had 97% conversion of C to T in the 10 clones analyzed.

(B) DNA methylation was not detected in the promoter region (nucleotides -5234 to -4978) of *E*<sup>2</sup>. (C) DNA methylation was not observed in the promoter region

(nucleotides -5042 to -4900) of *E*<sup>2</sup>. Unconverted genomic sequence is shown on the top. P1: The promoter region (nucleotides -5234 to -4978) was amplified using

primer pair No 30. P2: The promoter region (nucleotides -5042 to -4900) was amplified using primer pair No 29. (D) DNA methylation was not detected in the

promoter region (-5234 to -4900) of the *FAE1* allele *E*<sup>2</sup> in the three plants Y496-1, -2 and -3. Ten clones were analyzed for each bisulfite treatment.

13A

Unconverted *ATP1* : TGAACGAG--ATTCAAGCTGGGAAATGGTTCTTTTTC<sup>20</sup>CCAAACGGTGTGAAAGGAATGGCC<sup>40</sup>TGAATCTT<sup>60</sup>GAGAATGAGAA : 79  
*ATP1-Y1130-1* : TGAACGATGTATTTAAGCTGGGAAATGGTTCTTTTTC<sup>20</sup>CAAAAGGTGTGAAAGGAATGGTTTGAATTTT<sup>60</sup>GAGAATGAGAA : 80  
*ATP1-Y1130-2* : TGAACGAG--ATTCAAGCTGGGAAATGGTTCTTTTTC<sup>20</sup>GTTAATGGTGTGAAAGGAATGGTTTGAATTTT<sup>60</sup>GAGAATGAGAA : 79  
*ATP1-Y1130-3* : TGAATGAG--ATTCAAGCTGGGAAATGGTTCTTTTTC<sup>20</sup>TAAACGGTGTGAAAGGAATGGTTTGAATTTT<sup>60</sup>GAGAATGAGAA : 79  
*ATP1-Y1130-4* : TGAATGAG--ATTCAAGCTGGGAAATGGTTCTTTTTC<sup>20</sup>GTTAATGGTGTGAAAGGAATGGTTTGAATTTT<sup>60</sup>GAGAATGAGAA : 79  
*ATP1-Y1130-5* : TGAATGAG--ATTCAAGCTGGGAAATGGTTCTTTTTC<sup>20</sup>GTTAATGGTGTGAAAGGAATGGTTTGAATTTT<sup>60</sup>GAGAATGAGAA : 79  
*ATP1-Y1130-6* : TGAACGAG--ATTCAAGCTGGGAAATGGTTCTTTTTC<sup>20</sup>GTTAATGGTGTGAAAGGAATGGTTTGAATTTT<sup>60</sup>GAGAATGAGAA : 79  
*ATP1-Y1130-7* : TGAATGAG--ATTCAAGCTGGGAAATGGTTCTTTTTC<sup>20</sup>GTTAATGGTGTGAAAGGAATGGTTTGAATTTT<sup>60</sup>GAGAATGAGAA : 79  
*ATP1-Y1130-8* : TGAATGAG--TTTCAAGCTGGGAAATGGTTCTTTTTC<sup>20</sup>GTTAATGGTGTGAAAGGAATGGTTTGAATTTT<sup>60</sup>GAGAATGAGAA : 79  
*ATP1-Y1130-9* : TGAATGAG--ATTCAAGCTGGGAAATGGTTCTTTTTC<sup>20</sup>GTTAATGGTGTGAAAGGAATGGTTTGAATTTT<sup>60</sup>GAGAATGAGAA : 79  
*ATP1-Y1130-10* : TGAATGAG--ATTCAAGCTGGGAAATGGTTCTTTTTC<sup>20</sup>GTTAATGGTGTGAAAGGAATGGTTTGAATTTT<sup>60</sup>GAGAATGAGAA : 79

Unconverted *ATP1* : TGTGGGATGTTGTCTTTGGTGGT<sup>100</sup>GATACCGCTATAAAAAGAAGGAGATCTTGTCAAGCC<sup>120</sup>ACTGGATCTATTGTGGATG : 160  
*ATP1-Y1130-1* : TGTGGGATGTTGTCTTTGGTGGT<sup>100</sup>GATATTGTTATAAAAAGAAGGAGATTTGTTAAGTGTATTGGATTTATTGTGGATG : 161  
*ATP1-Y1130-2* : TGTGGGATGTTGTCTTTGGTGGT<sup>100</sup>GATATTGTTATAAAAAGAAGGAGATTTGTTAAGTGTATTGGATTTATTGTGGATG : 160  
*ATP1-Y1130-3* : TGTGGGATGTTGTCTTTGGTGGT<sup>100</sup>GATATTGTTATAAAAAGAAGGAGATCTTGTTAAGTGTATTGGATTTATTGTGGATG : 160  
*ATP1-Y1130-4* : TGTGGGATGTTGTCTTTGGTGGT<sup>100</sup>GATATTGTTATAAAAAGAAGGAGATTTGTTAAGTGTATTGGATTTATTGTGGATG : 160  
*ATP1-Y1130-5* : TGTGGGATGTTGTCTTTGGTGGT<sup>100</sup>GATATTGTTATAAAAAGAAGGAGATTTGTTAAGTGTATTGGATTTATTGTGGATG : 160  
*ATP1-Y1130-6* : TGTGGGATGTTGTCTTTGGTGGT<sup>100</sup>GATATTGTTATAAAAAGAAGGAGATTTGTTAAGTGTATTGGATTTATTGTGGATG : 160  
*ATP1-Y1130-7* : TGTGGGATGTTGTCTTTGGTGGT<sup>100</sup>GATATTGTTATAAAAAGAAGGAGATTTGTTAAGTGTATTGGATTTATTGTGGATG : 160  
*ATP1-Y1130-8* : TGTGGGATGTTGTCTTTGGTGGT<sup>100</sup>GATATTGTTATAAAAAGAAGGAGATTTGTTAAGTGTATTGGATTTATTGTGGATG : 160  
*ATP1-Y1130-9* : TGTGGGATGTTGTCTTTGGTGGT<sup>100</sup>GATATTGTTATAAAAAGAAGGAGATTTGTTAAGTGTATTGGATTTATTGTGGATG : 160  
*ATP1-Y1130-10* : TGTGGGATGTTGTCTTTGGTGGT<sup>100</sup>GATATTGTTATAAAAAGAAGGAGATTTGTTAAGTGTATTGGATTTATTGTGGATG : 160

Unconverted *ATP1* : TCCGCCGGAAAGGCTATGCTAGGGCTGTGGCTCGACCGC<sup>180</sup>GATGGGAGTACCTATTGATGGAAGAGGG : 227  
*ATP1-Y1130-1* : TTTTGTGGAAAGGTTATGTTAGGGTGTGGTGTGATGTGAGGGGAGTACTTCTTCTGATCTTGTGGGG : 228  
*ATP1-Y1130-2* : TTTTGTGGAAAGGTTATGTTAGGGTGTGGTGTGATGTGAGGGGAGTAACTACTAGTCCGGCCGCC : 227  
*ATP1-Y1130-3* : TTTTGTGGAAAGGCTATGCTAGGGTGTGGTGTGATGTGAGGGGAGTAACTACTAGTCCGGCCGCC : 226  
*ATP1-Y1130-4* : TTTTGTGGAAAGGTTATGTTAGGGTGTGGCTGATGTGATGGGAGTATTTATTGCTGGAAGAGGG : 227  
*ATP1-Y1130-5* : TTTTGTGGAAAGGTTATGTTAGGGTGTGGTGTGATGTGATGGGAGTACTTATTGATGGAAGAGGG : 227  
*ATP1-Y1130-6* : TTTTGTGGAAAGGTTATGTTAGGGTGTGGTGTGATGTGATGGGAGTATTTATTGATGGAAGAGGG : 227  
*ATP1-Y1130-7* : TTTTGTGGAAAGGTTATGTTAGGGTGTGGTGTGATGTGATGGGAGTACTTATTGATGGAAGAGGG : 227  
*ATP1-Y1130-8* : TTTTGTGGAAAGGTTATGTTAGGGTGTGGTGTGATGTGATGGGAGTACTTATTGATGGAAGAGGG : 227  
*ATP1-Y1130-9* : TTTTGTGGAAAGGTTATGTTAGGGTGTGGTGTGATGTGATGGGAGTACTTATTGATGGAAGAGGG : 227  
*ATP1-Y1130-10* : TTTTGTGGAAAGGTTATGTTAGGGTGTGGTGTGATGTGATGGGAGTATTTATTGATGGAAGAGGG : 227

13B

Unconverted *P1* : TCAAAGAAGATCTTTGTAGTTAGAGACAGAAATCTACATACTCTTTATTTGGAGTAA<sup>20</sup>CAATGGAGATATTTAAGCAATGA : 81  
*P1-E<sup>3</sup>(Y1130)-1* : TTAAGAAGATTTTTGTAGTTAGAGATAGAAATTTATATATTTTTATTTGGAGTAAATGGAGATATTTAAGCAATGA : 81  
*P1-E<sup>3</sup>(Y1130)-2* : TTAAGAAGATTTTTGTAGTTAGAGATAGAAATTTATATATTTTTATTTGGAGTAAATGGAGATATTTAAGCAATGA : 81  
*P1-E<sup>3</sup>(Y1130)-3* : TTAAGAAGATTTTTGTAGTTAGAGATAGAAATTTATATATTTTTATTTGGAGTAAATGGAGATATTTAAGCAATGA : 81  
*P1-E<sup>3</sup>(Y1130)-4* : TTAAGAAGATTTTTGTAGTTAGAGATAGAAATTTATATATTTTTATTTGGAGTAAATGGAGATATTTAAGCAATGA : 81  
*P1-E<sup>3</sup>(Y1130)-5* : TTAAGAAGATTTTTGTAGTTAGAGATAGAAATTTATATATTTTTATTTGGAGTAAATGGAGATATTTAAGCAATGA : 81  
*P1-E<sup>3</sup>(Y1130)-6* : TTAAGAAGATTTTTGTAGTTAGAGATAGAAATTTATATATTTTTATTTGGAGTAAATGGAGATATTTAAGCAATGA : 81  
*P1-E<sup>3</sup>(Y1130)-7* : TTAAGAAGATTTTTGTAGTTAGAGATAGAAATTTATATATTTTTATTTGGAGTAAATGGAGATATTTAAGCAATGA : 81  
*P1-E<sup>3</sup>(Y1130)-8* : TTAAGAAGATTTTTGTAGTTAGAGATAGAAATTTATATATTTTTATTTGGAGTAAATGGAGATATTTAAGCAATGA : 81  
*P1-E<sup>3</sup>(Y1130)-9* : TTAAGAAGATTTTTGTAGTTAGAGATAGAAATTTATATATTTTTATTTGGAGTAAATGGAGATATTTAAGCAATGA : 81  
*P1-E<sup>3</sup>(Y1130)-10* : TTAAGAAGATTTTTGTAGTTAGAGATAGAAATTTATATATTTTTATTTGGAGTAAATGGAGATATTTAAGCAATGA : 81

Unconverted *P1* : ATTTATGAGTTATATTTATATAGTTTATTT<sup>-5146</sup>CAATTTTAATTGAAAGCATTATTTTATCGAAATGAAATCTAGTATATAA : 162  
*P1-E<sup>3</sup>(Y1130)-1* : ATTTATGAGTTATATTTATATAGTTTATTT<sup>-5146</sup>CAATTTTAATTGAAAGTATTATTTTATCGAAATGAAATTTAGTATATAA : 162  
*P1-E<sup>3</sup>(Y1130)-2* : ATTTATGAGTTATATTTATATAGTTTATTT<sup>-5146</sup>CAATTTTAATTGAAAGTATTATTTTATCGAAATGAAATCTAGTATATAA : 162  
*P1-E<sup>3</sup>(Y1130)-3* : ATTTATGAGTTATATTTATATAGTTTATTT<sup>-5146</sup>CAATTTTAATTGAAAGTATTATTTTATCGAAATGAAATTTAGTATATAA : 162  
*P1-E<sup>3</sup>(Y1130)-4* : ATTTATGAGTTATATTTATATAGTTTATTT<sup>-5146</sup>CAATTTTAATTGAAAGTATTATTTTATCGAAATGAAATTTAGTATATAA : 162  
*P1-E<sup>3</sup>(Y1130)-5* : ATTTATGAGTTATATTTATATAGTTTATTT<sup>-5146</sup>CAATTTTAATTGAAAGTATTATTTTATCGAAATGAAATTTAGTATATAA : 162  
*P1-E<sup>3</sup>(Y1130)-6* : ATTTATGAGTTATATTTATATAGTTTATTT<sup>-5146</sup>CAATTTTAATTGAAAGTATTATTTTATCGAAATGAAATTTAGTATATAA : 162  
*P1-E<sup>3</sup>(Y1130)-7* : ATTTATGAGTTATATTTATATAGTTTATTT<sup>-5146</sup>CAATTTTAATTGAAAGTATTATTTTATCGAAATGAAATTTAGTATATAA : 162  
*P1-E<sup>3</sup>(Y1130)-8* : ATTTATGAGTTATATTTATATAGTTTATTT<sup>-5146</sup>CAATTTTAATTGAAAGTATTATTTTATCGAAATGAAATTTAGTATATAA : 162  
*P1-E<sup>3</sup>(Y1130)-9* : ATTTATGAGTTATATTTATATAGTTTATTT<sup>-5146</sup>CAATTTTAATTGAAAGTATTATTTTATCGAAATGAAATTTAGTATATAA : 162  
*P1-E<sup>3</sup>(Y1130)-10* : ATTTATGAGTTATATTTATATAGTTTATTT<sup>-5146</sup>CAATTTTAATTGAAAGTATTATTTTATCGAAATGAAATTTAGTATATAA : 162

```

      *           180           *           200           *           220           *           240
Unconverted P1 : TATAATGTTTTATCATTAGG-ATATTTTCTT-ATTTTTTGGCACCTTTC-ATAGGACTACTGATTTATTTCAATGTGTATG : 240
P1-E3(Y1130)-1 : TATAATGTTTTATATTAGG-ATATTTTCTT-ATTTTTTGGTATTTTTT-ATAGGATTATTGATTTATTTAATGTGTATG : 240
P1-E3(Y1130)-2 : TATAATGTTTTATCATTAGG-ATATTTTCTT-ATTTTTTGGTACCTTTC-ATAGGATTATTGATTTATTTAATGTGTATG : 240
P1-E3(Y1130)-3 : TATAATGTTTTATATTAGG-ATATTTTCTT-ATTTTTTGGTATTTTTT-ATAGGATTATTGATTTATTTAATGTGTATG : 240
P1-E3(Y1130)-4 : TATAATGTTTTATATTAGG-ATATTTTCTT-ATTTTTTGGTATTTTTT-ATAGGATTATTGATTTATTTAATGTGTATG : 240
P1-E3(Y1130)-5 : TATAATGTTTTATATTAGG-ATATTTTCTT-ATTTTTTGGTATTTTTT-ATAGGATTATTGATTTATTTAATGTGTATG : 240
P1-E3(Y1130)-6 : TATAATGTTTTATATTAGG-ATATTTTCTT-ATTTTTTGGTATTTTTT-ATAGGATTATTGATTTATTTAATGTGTATG : 240
P1-E3(Y1130)-7 : TATAATGTTTTATATTAGGATATTTTTTTTATTTTTTGGTATTTTTTTATAGGATTATTGATTTATTTAATGGGGAG : 243
P1-E3(Y1130)-8 : TATAATGTTTTATATTAGG-ATATTTTCTT-ATTTTTTGGTATTTTTT-ATAGGATTATTGATTTATTTAATGTGTATG : 240
P1-E3(Y1130)-9 : TATAATGTTTTATCATTAGG-ATACTTTCTT-ATTTTTTGGCACCTTTC-ATAGGATTATTGATTTATTTAATGTGTATG : 240
P1-E3(Y1130)-10 : TATAATGTTTTATATTAGG-ATATTTTCTT-ATTTTTTGGTATTTTTT-ATAGGATTATTGATTTATTTAATGTGTATG : 240

```

```

      *           260
Unconverted P1 : CCTGCATGAGCATGAGT : 257
P1-E3(Y1130)-1 : TTTGTATGAGTATGAGT : 257
P1-E3(Y1130)-2 : TTTGTATGAGTATGAGT : 257
P1-E3(Y1130)-3 : TTTGTATGAGTATGAGT : 257
P1-E3(Y1130)-4 : TTTGTATGAGTATGAGT : 257
P1-E3(Y1130)-5 : TTTGTATGAGTATGAGT : 257
P1-E3(Y1130)-6 : TTTGTATGAGTATGAGT : 257
P1-E3(Y1130)-7 : GTTGGAGAGTATGAGT : 260
P1-E3(Y1130)-8 : TTTGTATGAGTATGAGT : 257
P1-E3(Y1130)-9 : TTTGTATGAGTATGAGT : 257
P1-E3(Y1130)-10 : TTTGTATGAGTATGAGT : 257

```

### 13C

```

      *           20           *           40           *           60           *           80
Unconverted P2 : ATTTTTTGGCACCTTTC-ATAGGACTACTGATTTATTTCAATGTGTATGCTTGCATGAGCATGAGTATACACATGCTTTTAAA : 82
P2-E3(Y1130)-1 : ATTTTTTGGTATTTTTT-ATAGGATTATTGATTTATTTAATGTGTATGTTTGCATGAGTATGAGTATACATATGCTTTTAAA : 82
P2-E3(Y1130)-2 : ATTTTTTGGTATTTTTT-ATAGGATTACTGATTTATTTAATGTGTATGTTTGCATGAGTATGAGTATACATATGCTTTTAAA : 82
P2-E3(Y1130)-3 : ATTTTTTGGTATTTTTT-ATAGGATTATTGATTTATTTAATGTGTATGTTTGCATGAGTATGAGTATACATATGCTTTTAAA : 82
P2-E3(Y1130)-4 : ATTTTTTGGTATTTTTT-ATAGGATTATTGATTTATTTAATGTGTATGTTTGCATGAGTATGAGTATACATATGCTTTTAAA : 82
P2-E3(Y1130)-5 : ATTTTTTGGTATTTTTT-ATAGGATTATTGATTTATTTAATGTGTATGTTTGCATGAGTATGAGTATACATATGCTTTTAAA : 82
P2-E3(Y1130)-6 : ATTTTTTGGTATTTTTT-ATAGGATTATTGATTTATTTAATGTGTATGTTTGCATGAGTATGAGTATACATATGCTTTTAAA : 82
P2-E3(Y1130)-7 : TTTTTTGGTATTTTTTATAGGATTATTGATTTATTTAATGGGCAAGCTTGCAGAGTATGAGTATACATATGCTTTTAAA : 83
P2-E3(Y1130)-8 : ATTTTTTGGTATTTTTT-ATAGGATTATTGATTTATTTAATGTGTATGTTTGCATGAGTATGAGTATACATATGCTTTTAAA : 80
P2-E3(Y1130)-9 : ATTTTTTGGCACCTTTC-ATAGGACTACTGATTTATTTAATGTGTATGTTTGCATGAGTATGAGTATACATATGCTTTTAAA : 82
P2-E3(Y1130)-10 : ATTTTTTGGTATTTTTT-ATAGGATTATTGATTTATTTAATGTGTATGTTTGCATGAGTATGAGTATACATATGCTTTTAAA : 82

```

```

      *           1004943           *           120           *           140
Unconverted P2 : AATGATGTAAGTGTAAACGGACCACAAAAGAGGATCTATACAAATACATCTCATCAGCTTC : 143
P2-E3(Y1130)-1 : AAACAAGCAAAAGTGTAAACGGATTATAAAAAGAGGATTTATATAATGTATTTTTATTATTTT : 142
P2-E3(Y1130)-2 : AATGATGTAAGTGTAAACGGATTATAAAAAGAGGATTTATATAAATATATTTTATTATTTT : 143
P2-E3(Y1130)-3 : AATGATGTAAGTGTAAACGGATTATAAAAAGAGGATTTATATAAATATATTTTATTATTTT : 143
P2-E3(Y1130)-4 : AATGATGTAAGTGTAAACGGATTATAAAAAGAGGATTTATATAAATATATTTTATTATTTT : 143
P2-E3(Y1130)-5 : AATGATGTAAGTGTAAACGGATTATAAAAAGAGGATTTATATAAATATATTTTATTATTTT : 143
P2-E3(Y1130)-6 : AATGATGTAAGTGTAAACGGATTATAAAAAGAGGATTTATATAAATATATTTTATTATTTT : 143
P2-E3(Y1130)-7 : AATGATGTAAGTGTAAACGGATTATAAAAAGAGGATTTATATAAATATATTTTATTATTTT : 144
P2-E3(Y1130)-8 : AATGATGTAAGTGTAAACGGATTATAAAAAGAGGATTTATATAAATATATTTTATTATTTT : 141
P2-E3(Y1130)-9 : AATGATGTAAGTGTAAACGGATTATAAAAAGAGGATTTATATAAATATATTTTATTATTTT : 143
P2-E3(Y1130)-10 : AATGATGTAAGTGTAAACGGATTATAAAAAGAGGATTTATATAAATATATTTTATTATTTT : 143

```

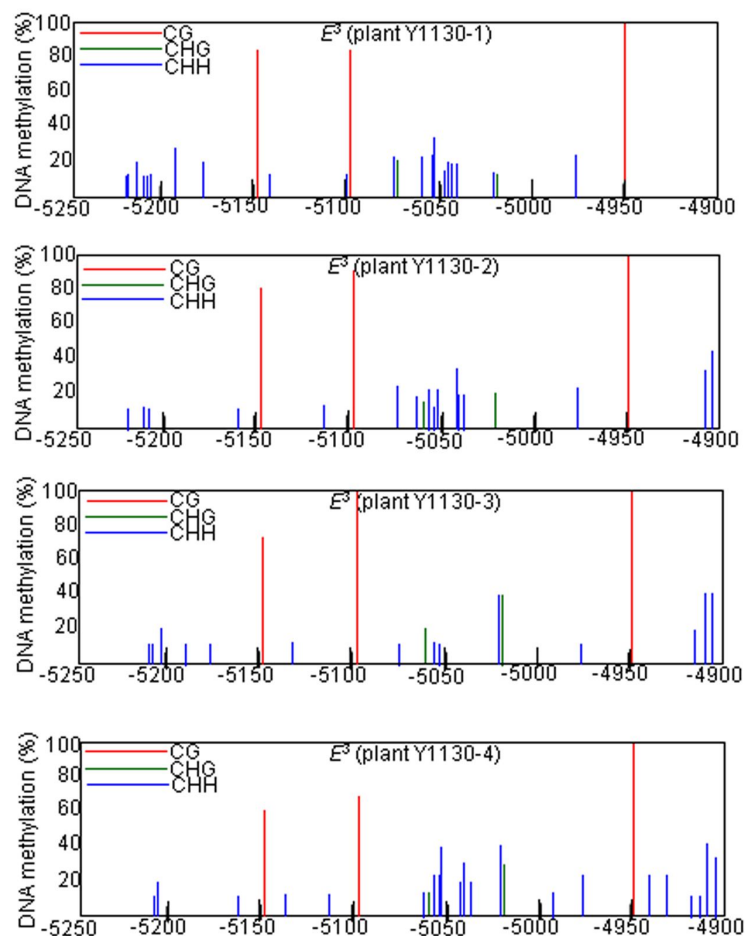

**Supplemental Figure 13. Bisulfite sequence alignment of *ATP1* (control gene) and the *FAE1* allele  $E^3$  in line Y1130.**

(A) The control gene *ATP1* in Y1130 had 100% conversion of C to T in the bisulfite treatment. (B) Methylation occurred at positions -5146 and -5095. (C) Methylation occurred at position -4943. Unconverted genomic sequence is shown on the top. P1: The promoter region (nucleotides -5234 to -4978) was amplified using primer pair No 30. P2: The promoter region (nucleotides -5042 to -4900) was amplified using primer pair No 29. (D) DNA methylation was detected at positions -5146, -5095 and -4943 in the promoter region (-5234 to -4900) of the *FAE1* allele  $E^3$  in the four plants Y1130-1, -2, -3 and -4. Ten clones were analyzed for each bisulfite experiment.

14A

Unconverted *ATP1* : TGAACGAGATTCAAGCTGGGGAATGGTCTTTTTGCCAACGGTGTGAAAGGAATGCCCTTGAATCTTGAGAATGAGAATG : 81  
*ATP1*-Revertant1-1 : TGAATGAGATTAAAGCTGGGGAATGGTCTTTTTGTTAATGGTGTGAAAGGAATGGTTTTGAATTTGAGAATGAGAATG : 81  
*ATP1*-Revertant1-2 : TGAATGAGATTAAAGCTGGGGAATGGTCTTTTTGTTAATGGTGTGAAAGGAATGGTTTTGAATTTGAGAATGAGAATG : 81  
*ATP1*-Revertant1-3 : TGAATGAGATTAAAGCTGGGGAATGGTCTTTTTGTTAATGGTGTGAAAGGAATGGTTTTGAATTTGAGAATGAGAATG : 81  
*ATP1*-Revertant1-4 : TGAATGAGATTAAAGCTGGGGAATGGTCTTTTTGTTAATGGTGTGAAAGGAATGGTTTTGAATTTGAGAATGAGAATG : 81  
*ATP1*-Revertant1-5 : TGAATGAGATTAAAGCTGGGGAATGGTCTTTTTGTTAATGGTGTGAAAGGAATGGTTTTGAATTTGAGAATGAGAATG : 81  
*ATP1*-Revertant1-6 : TGAATGAGATTAAAGCTGGGGAATGGTCTTTTTGTTAATGGTGTGAAAGGAATGGTTTTGAATTTGAGAATGAGAATG : 81  
*ATP1*-Revertant1-7 : TGAATGAGATTAAAGCTGGGGAATGGTCTTTTTGTTAATGGTGTGAAAGGAATGGTTTTGAATTTGAGAATGAGAATG : 81  
*ATP1*-Revertant1-8 : TGAATGAGATTAAAGCTGGGGAATGGTCTTTTTGTTAATGGTGTGAAAGGAATGGTTTTGAATTTGAGAATGAGAATG : 81  
*ATP1*-Revertant1-9 : TGAATGAGATTAAAGCTGGGGAATGGTCTTTTTGTTAATGGTGTGAAAGGAATGGTTTTGAATTTGAGAATGAGAATG : 81  
*ATP1*-Revertant1-10 : TGAACGAGATTCAAGCTGGGGAATGGTCTTTTTGTTAATGGTGTGAAAGGAATGGTTTTGAATTTGAGAATGAGAATG : 81

Unconverted *ATP1* : TCGGGATTGTTGCTTTTGGTGGTGATACCGCTATAAAAAGAGGAGATCTTGTCAAGCGCACTGGATCTATTGUGGATGTTG : 162  
*ATP1*-Revertant1-1 : TTGGGATTGTTGTTTTTGGTGGTGATATTGTTATAAAAAGAGGAGATTTTGTAAAGTGATTTGGATTTATTGUGGATGTTG : 162  
*ATP1*-Revertant1-2 : TTGGGATTGTTGTTTTTGGTGGTGATATTGTTATAAAAAGAGGAGATTTTGTAAAGTGATTTGGATTTATTGUGGATGTTG : 162  
*ATP1*-Revertant1-3 : TTGGGATTGTTGTTTTTGGTGGTGATATTGTTATAAAAAGAGGAGATTTTGTAAAGTGATTTGGATTTATTGUGGATGTTG : 162  
*ATP1*-Revertant1-4 : TTGGGATTGTTGTTTTTGGTGGTGATATTGTTATAAAAAGAGGAGATTTTGTAAAGTGATTTGGATTTATTGUGGATGTTG : 162  
*ATP1*-Revertant1-5 : TTGGGATTGTTGTTTTTGGTGGTGATATTGTTATAAAAAGAGGAGATTTTGTAAAGCGCTTGGCTTTTTCGCAATGTTG : 161  
*ATP1*-Revertant1-6 : TTGGGATTGTTGTTTTTGGTGGTGATATTGTTATAAAAAGAGGAGATTTTGTAAAGTGATTTGGATTTATTGUGGATGTTG : 162  
*ATP1*-Revertant1-7 : TTGGGATTGTTGTTTTTGGTGGTGATATTGTTATAAAAAGAGGAGATTTTGTAAAGTGATTTGGATTTATTGUGGATGTTG : 162  
*ATP1*-Revertant1-8 : TTGGGATTGTTGTTTTTGGTGGTGATATTGTTATAAAAAGAGGAGATTTTGTAAAGTGATTTGGATTTATTGUGGATGTTG : 162  
*ATP1*-Revertant1-9 : TTGGGATTGTTGTTTTTGGTGGTGATATTGTTATAAAAAGAGGAGATTTTGTAAAGTGATTTGGATTTATTGUGGATGTTG : 162  
*ATP1*-Revertant1-10 : TTGGGATTGTTGTTTTTGGTGGTGATATTGTTATAAAAAGAGGAGATTTTGTAAAGTGATTTGGATTTATTGUGGATGTTG : 162

Unconverted *ATP1* : CCGCGGGAAAGGCTATGCTAGGGCTGTGGTCCAGCCGATGGGAGTACCTATTGATGSAAGAGGE : 227  
*ATP1*-Revertant1-1 : TTGTGGGAAAGGTTATGTTAGGGCTGTGGTTCAGTGTGATGGGAGTACCTATTGATGSAAGAGGA : 227  
*ATP1*-Revertant1-2 : TTGTGGGAAAGGTTATGTTAGGGCTGTGGTTCAGTGTGATGGGAGTATTATTGATGSAAGAGGE : 227  
*ATP1*-Revertant1-3 : TTGTGGGAAAGGTTATGTTAGGGCTGTGGTTCAGTGTGATGGGAGTATTATTGATGSAAGAGGE : 227  
*ATP1*-Revertant1-4 : TTGTGGGAAAGGTTATGTTAGGGCTGTGGTTCAGTGTGATGGGAGTACCTATTGATGSAAGAGGE : 227  
*ATP1*-Revertant1-5 : TTGTGGGAAAGGTTATGTTAGGGCTGTGGTTCAGTGTGATGGGAGTATTATTGATGSAAGAGGE : 225  
*ATP1*-Revertant1-6 : TTGTGGGAAAGGTTATGTTAGGGCTGTGGTTCAGTGTGATGGGAGTACTATTGATGSAAGAGGE : 227  
*ATP1*-Revertant1-7 : TTGTGGGAAAGGTTATGTTAGGGCTGTGGTTCAGTGTGATGGGAGTACTATTGATGSAAGAGGE : 227  
*ATP1*-Revertant1-8 : TTGTGGGAAAGGTTATGTTAGGGCTGTGGTTCAGTGTGATGGGAGTACTATTGATGSAAGAGGE : 227  
*ATP1*-Revertant1-9 : TTGTGGGAAAGGTTATGTTAGGGCTGTGGTTCAGTGTGATGGGAGTACTATTGATGSAAGAGGE : 227  
*ATP1*-Revertant1-10 : TTGTGGGAAAGGTTATGTTAGGGCTGTGGTTCAGTGTGATGGGAGTACTATTGATGSAAGAGGE : 227

14B

Unconverted *P1* : TCAAAGAAGATCTTTGTAGTTAGAGACAGAAATCTACATAGCTCTTTATTTGGAGTAACAAATGGAGATATTTTAAGCAATGA : 81  
*P1*-Revertant1-1 : TTAAGAAGATTTTGTAGTTAGAGATAGAAATTTAATATAATTTTATTTGGAGTAATAATGGAGATATTTTAAGTAATGA : 81  
*P1*-Revertant1-2 : TTAAGAAGATTTTGTAGTTAGAGATAGAAATTTAATATACTTTTATTTGGAGTAACAAATGGAGATATTTTAAGLAATGA : 81  
*P1*-Revertant1-3 : TTAAGAAGATTTTGTAGTTAGAGATAGAAATTTAATATAATTTTATTTGGAGTAATAATGGAGATATTTTAAGLAATGA : 81  
*P1*-Revertant1-4 : TTAAGAAGATTTTGTAGTTAGAGATAGAAATTTAATATAATTTTATTTGGAGTAATAATGGAGATATTTTAAGTAATGA : 81  
*P1*-Revertant1-5 : TTAAGAAGATTTTGTAGTTAGAGATAGAAATTTAATATAATTTTATTTGGAGTAATAATGGAGATATTTTAAGLAATGA : 81  
*P1*-Revertant1-6 : TTAAGAAGATTTTGTAGTTAGAGATAGAAATTTAATATAATTTTATTTGGAGTAATAATGGAGATATTTTAAGLAATGA : 81  
*P1*-Revertant1-7 : TTAAGAAGATTTTGTAGTTAGAGATAGAAATTTAATATAATTTTATTTGGAGTAATAATGGAGATATTTTAAGTAATGA : 81  
*P1*-Revertant1-8 : TTAAGAAGATTTTGTAGTTAGAGATAGAAATTTAATATAATTTTATTTGGAGTAATAATGGAGATATTTTAAGLAATGA : 81  
*P1*-Revertant1-9 : TTAAGAAGATTTTGTAGTTAGAGATAGAAATTTAATATAATTTTATTTGGAGTAATAATGGAGATATTTTAAGLAATGA : 81  
*P1*-Revertant1-10 : TTAAGAAGATTTTGTAGTTAGAGATAGAAATTTAATATAATTTTATTTGGAGTAATAATGGAGATATTTTAAGLAATGA : 81

Unconverted *P1* : ATTTATGAGCTTATATTTATATAGTTTATTTTCAATTTTAAATTGAAAGCATTATTTTTATTGAAATGAAATCTAGTATATAA : 162  
*P1*-Revertant1-1 : ATTTATGAGCTTATATTTATATAGTTTATTTTATTTTAAATTGAAAGTATTATTTTTATTGAAATGAAATTTAGTATATAA : 162  
*P1*-Revertant1-2 : ATTTATGAGCTTATATTTATATAGTTTATTTTATTTTAAATTGAAAGTATTATTTTTATTGAAATGAAATTTAGTATATAA : 162  
*P1*-Revertant1-3 : ATTTATGAGCTTATATTTATATAGTTTATTTTATTTTAAATTGAAAGTATTATTTTTATTGAAATGAAATTTAGTATATAA : 162  
*P1*-Revertant1-4 : ATTTATGAGCTTATATTTATATAGTTTATTTTATTTTAAATTGAAAGTATTATTTTTATTGAAATGAAATTTAGTATATAA : 162  
*P1*-Revertant1-5 : ATTTATGAGCTTATATTTATATAGTTTATTTTATTTTAAATTGAAAGTATTATTTTTATTGAAATGAAATTTAGTATATAA : 162  
*P1*-Revertant1-6 : ATTTATGAGCTTATATTTATATAGTTTATTTTATTTTAAATTGAAAGTATTATTTTTATTGAAATGAAATTTAGTATATAA : 162  
*P1*-Revertant1-7 : ATTTATGAGCTTATATTTATATAGTTTATTTTATTTTAAATTGAAAGTATTATTTTTATTGAAATGAAATTTAGTATATAA : 162  
*P1*-Revertant1-8 : ATTTATGAGCTTATATTTATATAGTTTATTTTATTTTAAATTGAAAGTATTATTTTTATTGAAATGAAATTTAGTATATAA : 162  
*P1*-Revertant1-9 : ATTTATGAGCTTATATTTATATAGTTTATTTTATTTTAAATTGAAAGTATTATTTTTATTGAAATGAAATTTAGTATATAA : 162  
*P1*-Revertant1-10 : ATTTATGAGCTTATATTTATATAGTTTATTTTATTTTAAATTGAAAGTATTATTTTTATTGAAATGAAATTTAGTATATAA : 162



```

      *      180      *      200      *      220      *      240
Unconverted P1 : TATAATGTTTTATCATCAGGATACTTTCCATATTTTGGCACCTTTCATAGGACTACTGATTTATTTCAATGTGTATGCCCT : 243
P1-Revertant1-1 : TATAATGTTTTATATAGGATACTTTTATATTTTGGTATTTTATAGGATTATTGATTTATTTAATGTGTATGTTT : 243
P1-Revertant1-2 : TATAATGTTTTATATAGGATACTTTTATATTTTGGTATTTTATAGGATTATTGATTTATTTAATGTGTATGTTT : 242
P1-Revertant1-3 : TATAATGTTTTATATAGGATACTTTTATATTTTGGTATTTTATAGGATTATTGATTTATTTAATGTGTATGTTT : 243
P1-Revertant1-4 : TATAATGTTTTATATAGGATACTTTTATATTTTGGTATTTTATAGGATTATTGATTTATTTAATGTGTATGTTT : 243
P1-Revertant1-5 : TATAATGTTTTATATAGGATACTTTTATATTTTGGTATTTTATAGGACTATTGATTTATTTAATGTGTATGTTT : 243
P1-Revertant1-6 : TATAATGTTTTATATAGGATACTTTTATATTTTGGTATTTTATAGGATTATCGATTTATTTAATGTGTATGTTT : 243
P1-Revertant1-7 : TATAATGTTTTATATAGGATACTTTTATATTTTGGTATTTTATAGGATTATTGATTTATTTAATGTGTATGTTT : 243
P1-Revertant1-8 : TATAATGTTTTATATAGGATACTTTTATATTTTGGTATTTTATAGGATTATTGATTTATTTAATGTGTATGTTT : 243
P1-Revertant1-9 : TATAATGTTTTATATAGGATACTTTTATATTTTGGTATTTTATAGGATTATTGATTTATTTAATGTGTATGTTT : 243
P1-Revertant1-10 : TATAATGTTTTATATAGGATACTTTTATATTTTGGTATTTTATAGGATTATTGATTTATTTAATGTGTATGTTT : 243

```

```

      *
Unconverted P1 : GCATGACCATGAGT : 257
P1-Revertant1-1 : GTATGAGTATGAGT : 257
P1-Revertant1-2 : GTATGAGTATGAGT : 256
P1-Revertant1-3 : GTATGAGTATGAGT : 257
P1-Revertant1-4 : GTATGAGTATGAGT : 257
P1-Revertant1-5 : GTATGAGTATGAGT : 257
P1-Revertant1-6 : GTATGAGTATGAGT : 257
P1-Revertant1-7 : GAAAGAAATGAAA : 257
P1-Revertant1-8 : GTATGAGTATGAGT : 257
P1-Revertant1-9 : GTATGAGTATGAGT : 257
P1-Revertant1-10 : GTATGAGTATGAGT : 257

```

## 14C

```

      *      20      *      40      *      60      *      80
Unconverted P2 : ATTTTTGGCACCTTTCATAGGACTACTGATTTATTTCAATGPGTATGCCGTGCATGACCATGACTATACACATGTCCTTTAAAAA : 83
P2-Revertant1-1 : ATTTTTGGTATTTTATAGGATTATTGATTTATTTAATGPGTATGTTTGTATGACTATGACTATACACATGTTTAAAAA : 83
P2-Revertant1-2 : ATTTTTGGTATTTTATAGGATTATTGATTTATTTAATGPGTATGTTTGTATGACTATGACTATACACATGTTTAAAAA : 83
P2-Revertant1-3 : ATTTTTGGTATTTTATAGGATTATTGATTTATTTAATGPGTATGTTTGTATGACTATGACTATACACATGTTTAAAAA : 83
P2-Revertant1-4 : ATTTTTGGTATTTTATAGGATTATTGATTTATTTAATGPGTATGTTTGTATGACTATGACTATACACATGTTTAAAAA : 83
P2-Revertant1-5 : ATTTTTGGTATTTTATAGGACTATTGATTTATTTAATGPGTATGTTTGTATGACTATGACTATACACATGTTTAAAAA : 83
P2-Revertant1-6 : ATTTTTGGTATTTTATAGGATTATCGATTTATTTAATGPGTATGTTTGTATGACTATGACTATACACATGTTTAAAAA : 83
P2-Revertant1-7 : ATTTTTGGTACCTTTCATAGGATTATTGATTTATTTAATGPGCATGTGAAAGAAATAGAA-ATATATATGCTTTAAAAA : 82
P2-Revertant1-8 : ATTTTTGGCATTTTTATAGGATTATTGATTTATTTAATGPGTATGTTTGTATGACTATGACTATACACATGTTTAAAAA : 83
P2-Revertant1-9 : ATTTTTGGTATTTTATAGGATTATTGATTTATTTAATGPGTATGTTTGTATGACTATGACTATACACATGTTTAAAAA : 83
P2-Revertant1-10 : ATTTTTGGTATCTTTCATAGGATTATTGATTTATTTAATGPGTATGTTTGTATGACTATGACTATACACATGTTTAAAAA : 83

```

```

      *      100      *      120      *      140
Unconverted P2 : ATGATGTAAAGTGTAAACGGACCACAAAAGGGATCTATACAAATACATCTCATCAGCTTC : 143
P2-Revertant1-1 : ATGATGTAAAGTGTAAACGGATTATAAAAAGGGATCTATACAAATATATTTTATTATTTT : 143
P2-Revertant1-2 : ATGATGTAAAGTGTAAACGGATTGCAAAAAGGGATTATATAAAATATATTTTATTACTTT : 143
P2-Revertant1-3 : ATGATGTAAAGTGTAAACGGATTATAAAAAGGGATCTATACAAATATATTTTATTATTTT : 143
P2-Revertant1-4 : ATGATGTAAAGTGTAAACGGATTATAAAAAGGGATTATATAAAATATATTTTATTATTTT : 143
P2-Revertant1-5 : ATGATGTAAAGTGTAAACGGATTGCAAAAAGGGATTATATAAAATATATTTTATTACTTT : 143
P2-Revertant1-6 : ATGATGTAAAGTGTAAACGGATTATAAAAAGGGATTATATAAAATATATTTTATTATTTT : 143
P2-Revertant1-7 : ATGATGTAAAGTGTAAACGGATTATAAAAAGGGATCTATACAAATATATTTTATTATTTT : 142
P2-Revertant1-8 : ATGATGTAAAGTGTAAACGGATTATAAAAAGGGATCTATACAAATATATTTTATTATTTT : 143
P2-Revertant1-9 : ATGATGTAAAGTGTAAACGGATTATAAAAAGGGATTATATAAAATATATTTTATTATTTT : 143
P2-Revertant1-10 : ATGATGTAAAGTGTAAACGGATTATAAAAAGGGATTATATAAAATATATTTTATTATTTT : 143

```

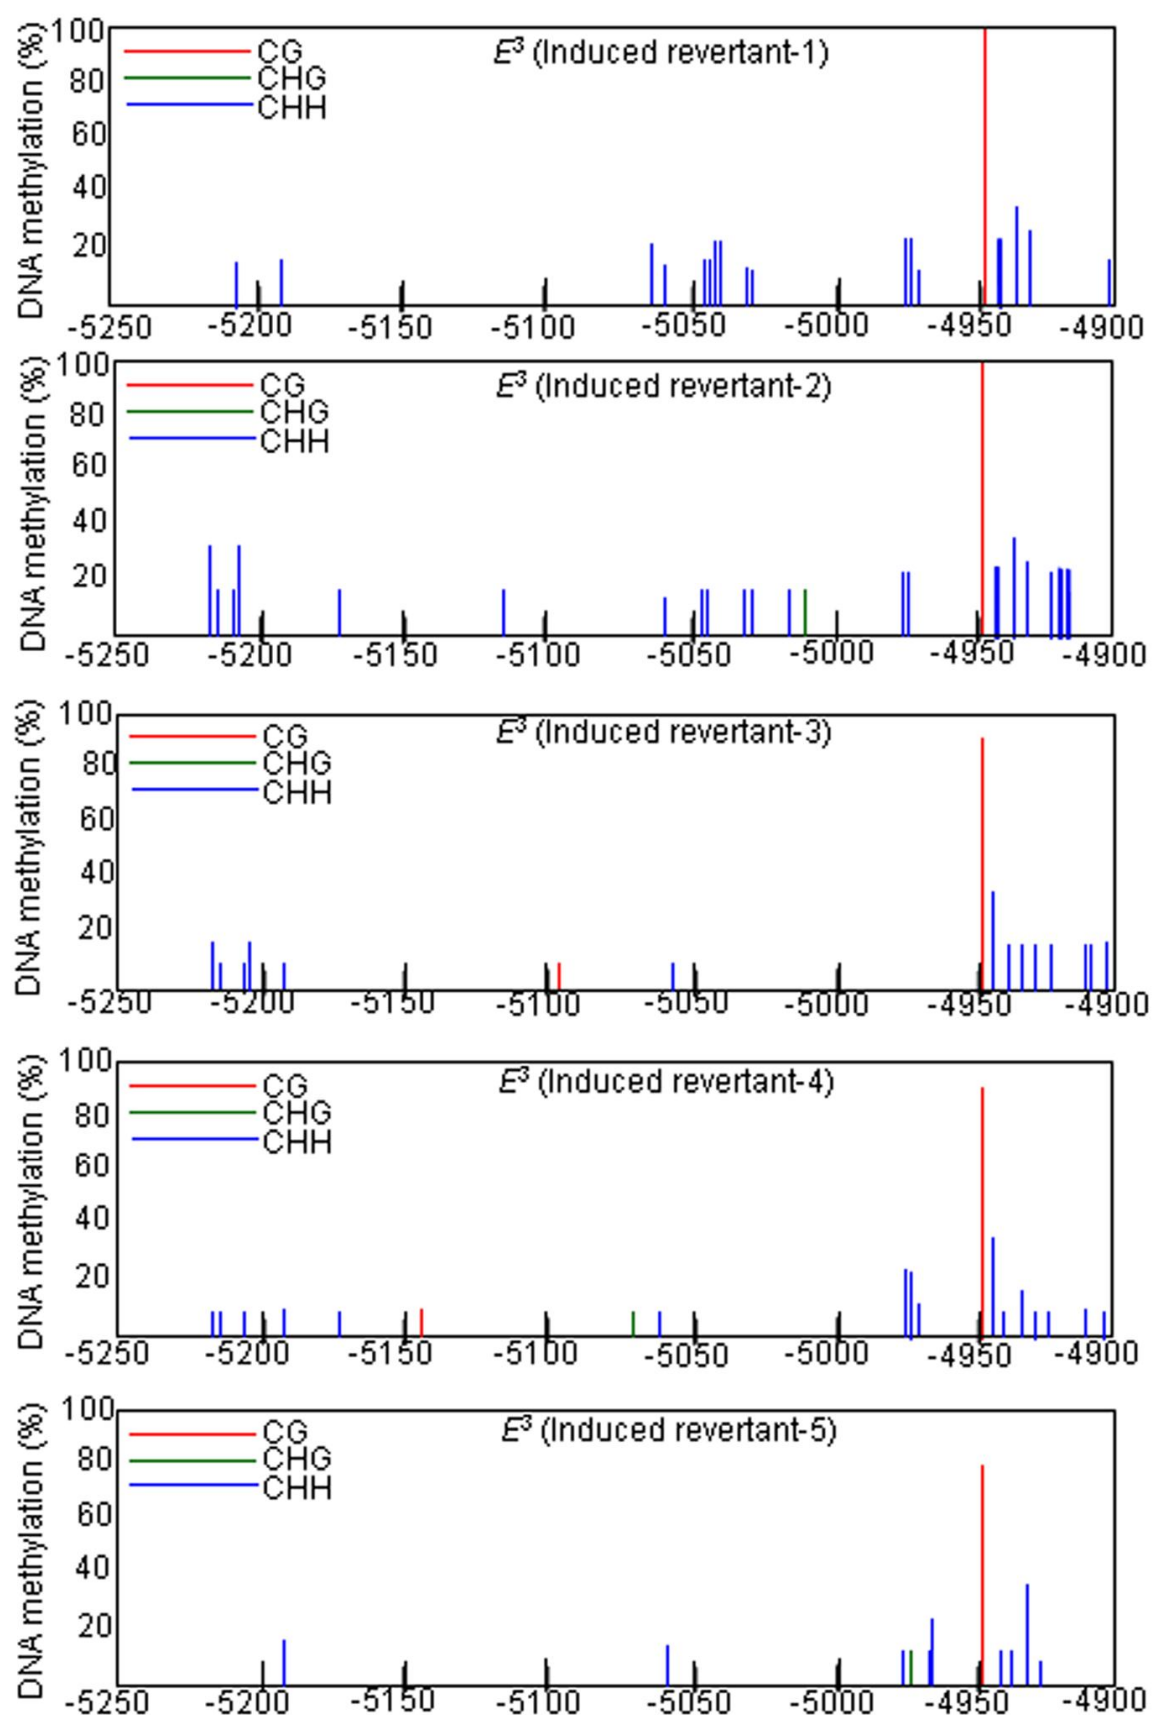

**Supplemental Figure 14. Bisulfite sequence alignment of *ATP1* (control gene) and the *FAE1* allele  $E^3$  in the 5-azaC induced revertants of Y1130.**

(A) The control gene *ATP1* had 97% conversion of C to T in the bisulfite treatment. (B) Methylation was not detected at positions -5146 and -5095. (C) Methylation was detected at position -4943. Unconverted genomic sequence is shown on the top. P1: The promoter region (nucleotides -5234 to -4978) was amplified using primer pair No 30. P2: The promoter region (nucleotides -5042 to -4900) was amplified using primer pair No 29. Revertant 1: 5-azaC induced revertant of Y1130. (D) DNA methylation was detected at position -4943 in the promoter region (nucleotides -5234 to -4900) of *FAE1* allele  $E^3$  in 5-azaC induced revertant-1, -2, -3, -4 and -5. Ten clones were analyzed for each bisulfite experiment.



```

      *           180           *           200           *           220           *           240
Unconverted P1 : TATAATGTTTATCATCAGGATACCTTCCATTTTTTTGGCACCTTCCATAGGACTACTGATTTATTTCAATGTGTATGCC : 243
P1-Revertant2-1 : TATAATGTTTATTTATCAGGATATTTTTTATTTTTTTGGCAATTTTTATAGGANTATTGATTTATTTAAATGTGTATGTT : 243
P1-Revertant2-2 : TATAATGTTTATTTATCAGGATATTTTTTATTTTTTTGGCAATTTTTATAGGANTATTGATTTATTTAAATGTGTATGTT : 243
P1-Revertant2-3 : TATAATGTTTATTTATCAGGATATTTTTTATTTTTTTGGCAATTTTTATAGGANTATTGATTTATTTAAATGTGTATGTT : 243
P1-Revertant2-4 : TATAATGTTTATTTATCAGGATATTTTTTATTTTTTTGGCAATTTTTATAGGANTATTGATTTATTTAAATGTGTATGTT : 243
P1-Revertant2-5 : TATAATGTTTATTTATCAGGATATTTTTTATTTTTTTGGCAATTTTTATAGGANTATTGATTTATTTAAATGTGTATGTT : 243
P1-Revertant2-6 : TATAATGTTTATTTATCAGGATATTTTTTATTTTTTTGGCAATTTTTATAGGANTATTGATTTATTTAAATGTGTATGTT : 243
P1-Revertant2-7 : TATAATGTTTATTTATCAGGATATTTTTTATTTTTTTGGCAATTTTTATAGGANTATTGATTTATTTAAATGTGTATGTT : 243
P1-Revertant2-8 : TATAATGTTTATTTATCAGGATATTTTTTATTTTTTTGGCAATTTTTATAGGANTATTGATTTATTTAAATGTGTATGTT : 243
P1-Revertant2-9 : TATAATGTTTATTTATCAGGATACCTTCCATTTTTTTGGCAATTTTTATAGGANTATTGATTTATTTAAATGTGTATGTT : 243
P1-Revertant2-10 : TATAATGTTTATTTATCAGGATATTTTTTATTTTTTTGGCAATTTTTATAGGANTATTGATTTATTTAAATGTGTATGTT : 243

```

```

      *
Unconverted P1 : GCATGACCATGAGT : 257
P1-Revertant2-1 : GTATGACTATGAGT : 257
P1-Revertant2-2 : GTATGACTATGAGT : 257
P1-Revertant2-3 : GTATGACTATGAGA : 257
P1-Revertant2-4 : GTATGACTATGAGT : 257
P1-Revertant2-5 : GTATGACTATGAGT : 257
P1-Revertant2-6 : GTATGACTATGAGT : 257
P1-Revertant2-7 : GTATGACTATGAGT : 257
P1-Revertant2-8 : GTATGACTATGAGT : 257
P1-Revertant2-9 : GTATGACTATGAGT : 257
P1-Revertant2-10 : GTATGACTATGAGT : 257

```

### 15C

```

      *           20           *           40           *           60           *           80
Unconverted P2 : ATTTTTTGGCACCTTCCATAGGACTACTGATTTATTTCAATGTGTATGCCCTGCATGACCATGAGTATACACATGCTTTAAAA : 83
P2-Revertant2-1 : ATTTTTTGGTATTTTTATAGGANTATTGATTTATTTAAATGTGTATGTTTGTATGATATGAGTATACACATGCTTTAAAA : 83
P2-Revertant2-2 : ATTTTTTGGTATTTTTATAGGANTATTGATTTATTTAAATGTGTATGTTTGTATGATATGAGTATACACATGCTTTAAAA : 83
P2-Revertant2-3 : ATTTTTTGGCATTTTTTATAGGANTATTGATTTATTTAAATGTGTATGTTTGTATGATATGAGTATACACATGCTTTAAAA : 83
P2-Revertant2-4 : ATTTTTTGGTATTTTTATAGGANTATTGATTTATTTAAATGTGTATGTTTGTATGATATGAGTATACACATGCTTTAAAA : 83
P2-Revertant2-5 : ATTTTTTGGTATTTTTATAGGANTATTGATTTATTTAAATGTGTATGTTTGTATGATATGAGTATACACATGCTTTAAAA : 83
P2-Revertant2-6 : ATTTTTTGGTATTTTTATAGGANTATTGATTTATTTAAATGTGTATGTTTGTATGATATGAGTATACACATGCTTTAAAA : 83
P2-Revertant2-7 : ATTTTTTGGTATTTTTATAGGANTATTGATTTATTTAAATGTGTATGTTTGTATGATATGAGTATACACATGCTTTAAAA : 83
P2-Revertant2-8 : ATTTTTTGGTATTTTTATAGGACTACTGATTTATTTAAATGTGTATGTTTGTATGATATGAGTATACACATGCTTTAAAA : 83
P2-Revertant2-9 : ATTTTTTGGCATTTTTTATAGGANTATTGATTTATTTAAATGTGTATGTTTGTATGATATGAGTATACACATGCTTTAAAA : 83
P2-Revertant2-10 : ATTTTTTGGTATTTTTATAGGANTATTGATTTATTTAAATGTGTATGTTTGTATGATATGAGTATACACATGCTTTAAAA : 83

```

```

      *           100           *           120           *           140
Unconverted P2 : ATCCATGTAAGTGTAACGGACCACAAAAGAGGATCTATACAAATACATCCTCATCAGCTTC : 143
P2-Revertant2-1 : ATCTATGTAAGTGTAACGGATTATAAAAAGAGGATTTATAATATGATTTTTTATTATTTT : 143
P2-Revertant2-2 : ATCTATGTAAGTGTAACGGATTATAAAAAGAGGATTTATAATATGATTTTTTATTATTTT : 143
P2-Revertant2-3 : ATCTATGTAAGTGTAACGGATTATAAAAAGAGGATTTATAATATGATTTTTTATTATTTT : 143
P2-Revertant2-4 : ATCTATGTAAGTGTAACGGATTATAAAAAGAGGATTTATAATATGATTTTTTATTATTTT : 143
P2-Revertant2-5 : ATCTATGTAAGTGTAACGGATTATAAAAAGAGGATTTATAATATGATTTTTTATTATTTT : 143
P2-Revertant2-6 : ATCTATGTAAGTGTAACGGATTATAAAAAGAGGATTTATAATATGATTTTTTATTATTTT : 143
P2-Revertant2-7 : ATCTATGTAAGTGTAACGGATTATAAAAAGAGGATTTATAATATGATTTTTTATTATTTT : 143
P2-Revertant2-8 : ATCTATGTAAGTGTAACGGATTATAAAAAGAGGATTTATAATATGATTTTTTATTATTTT : 143
P2-Revertant2-9 : ATCTATGTAAGTGTAACGGATTATAAAAAGAGGATTTATAATATGATTTTTTATTATTTT : 143
P2-Revertant2-10 : ATCTATGTAAGTGTAACGGATTATAAAAAGAGGATTTATAATATGATTTTTTATTATTTT : 143

```

## Supplemental Figure 15. Bisulfite sequence alignment of *ATP1* (control gene) and the *FAE1* allele *E*<sup>3</sup> in the spontaneous revertant Y1130-16.

(A) The control gene *ATP1* had 100% complete conversion of C to T in the bisulfite treatment. (B) Methylation was not detected at positions -5146 and -5095. (C) Methylation was detected at position -4943. Unconverted genomic sequence is shown on the top. P1: The promoter region (nucleotides -5234 to -4978) amplified using primer pair No 30. P2: The promoter region (nucleotides -5042 to -4900) amplified using primer pair No 29. Revertant 2: Spontaneous revertant Y1130-16. Ten clones were analyzed for each bisulfite experiment.

Supplemental Table 1 Primer pairs used in this study

| No | Primer name                 | Sequence (5'-3')                                            | Purpose                                                                                                      |
|----|-----------------------------|-------------------------------------------------------------|--------------------------------------------------------------------------------------------------------------|
| 1  | OF<br>OR                    | ATGACGTCCGTTAACGTA<br>TTAGGACCGACCGTTTTG                    | To clone the entire coding region of $E^1$ , $E^2$ , $E^3$                                                   |
| 2  | PF<br>OR                    | TCGGTTCGGTTCTCTACATC<br>TTAGGACCGACCGTTTTG                  | To clone the partial coding region of allele $e$                                                             |
| 3  | ZUP1-GSP-1*<br>ZUP1-GSP-2** | GAAGGTAGCATGAGTACTCAACGAGGT<br>GATGTAGAGAACCGAACCGAAGACGGT  | To clone the remaining coding region of $e$ by PCR walking                                                   |
| 4  | DOWN-GSP-1*<br>DOWN-GSP-2** | TGGAGGCATCAAGATCAACGTTACATA<br>TTCAGCTAAGTCAGAGACTCGTGTCCTA | To clone the 3' downstream sequences from the translation stop coding site for $E^1$ , $E^2$ , $E^3$ and $e$ |
| 5  | HUP1-GSP-1*<br>HUP1-GSP-2** | TGATAGGCTGAACCGACAGAGACTCTG<br>ACCGACAGAGACTCTGACTAATTATGG  | To clone the 5' upstream sequence of $E^1$ , $E^2$ , $E^3$                                                   |
| 6  | MUP1-GSP-1*<br>MUP1-GSP-2** | ACGTCTATCGACCTCTGCCAATGTGTA<br>CGATGACAAGGTCCACCAGTTCATAAT  | Primer pairs 6-9: to clone further 5' upstream sequence of $E^2$ and $E^3$                                   |
| 7  | MUP2-GSP-1*<br>MUP2-GSP-2** | AATCTTGTCTCCATACCACCTTGTTTCG<br>GTTCTATATGTGCCATCCTTGAAGTGC |                                                                                                              |
| 8  | MUP3-GSP-1*<br>MUP3-GSP-2** | TCACACCATCTCTGTTCCCTCAGTCCTC<br>CGTCTTCGGTCCAAGGTAACACACTCT |                                                                                                              |
| 9  | MUP4-GSP-1*<br>MUP4-GSP-2** | TGCTTGGAGACTCGCCTATCAGTTGGA<br>CAGGACACAGTATCTCACTCTTCCGCA  |                                                                                                              |
| 10 | CORE-F<br>CORE-R            | GCCTATCATTGCTAAGTACA<br>CTCATGCAGGCATACACATT                | To clone the 703 bp putative promoter sequences of $E^2$ , $E^3$ and $e$                                     |
| 11 | GAP-F<br>GAP-R              | CAATGTGTATGCCTGCATGA<br>TTGAAGGACAACATACGTGG                | To clone the DNA fragment between the promoter and 5' flanking sequence of $E^2$ and $E^3$                   |

|    |                             |                                                                |                                                                                                 |
|----|-----------------------------|----------------------------------------------------------------|-------------------------------------------------------------------------------------------------|
| 12 | MUP5-GSP-1*<br>MUP5-GSP-2** | ATCCTCTTTTGTGGTCCGTTACTTTT<br>TTTTGTGGTCCGTTACTTTACATGC        | To clone further promoter sequences of $E^2$ and $E^3$                                          |
| 13 | GAP0-F<br>GAP0-R            | CGACACACACACAGAGCA<br>CACGGATGGCTGCAGTACAC                     | To clone the DNA fragment between the promoter and 5' flanking sequence of <i>e</i>             |
| 14 | WF<br>WR                    | GCCTATCATTGCTAAGTAGA<br>TACTAGAACACCACTGCATT                   | To clone the entire gene sequences of $E^1$ , $E^2$ , $E^3$ and <i>e</i>                        |
| 15 | YF<br>YR                    | GAGCAATGACGTCCGTTA<br>GGACCGACCGTTTTG                          | To amplify the coding regions of $E^1$ and $E^2$ for yeast expression                           |
| 16 | ProF<br>ProR                | CGTAAGCTTCCTATCATTGCTAAGTAGAA<br>AGCTCTAGACTCATGCAGGCATACACATT | To clone the 5' upstream sequence from the translation start site for $E^1$                     |
| 17 | FP1<br>FP2                  | CGTAAGCTTTCTTCTTGAACCTTGGGA<br>AGCTCTAGATGCTCTGTGTGTGTGTCG     | To clone the 5' upstream sequence from the translation start site for $E^2$ and $E^3$           |
| 18 | OF<br>RTR                   | ATGACGTCCGTTAACGTA<br>AAGACTTGTCGTCAGCTCCA                     | RT-PCR                                                                                          |
| 19 | FAE1F1<br>FAE1R1            | AGACGGTCCAAGTACGAGCTAGTTC<br>TGCCGCTCTCATCATCTCCTT             | Quantitative Real-time PCR                                                                      |
| 20 | ActinF<br>ActinR            | ACGAGCTACCTGACGGACAAG<br>GAGCGACGGCTGGAAGAGTA                  | RT-PCR, Quantitative Real-time PCR                                                              |
| 21 | ATP1-F<br>ATP1-R            | TGAAYGAGATTYAAGYTGGGGAAATGGT<br>CCCTCTTCCATCAATARRTACTCCCA     | To amplify the <i>ATP1</i> gene as bisulfite control                                            |
| 22 | BSPCF1<br>BSPCR1            | YGTTYGTTAAYGTAAAGTTTTTTTT<br>TCCTCAAAAACCTCAAACCAAAAAC         | To study DNA methylation of the coding region of position 1 to 200 of $E^1$ , $E^2$ and $E^3$   |
| 23 | BSPCF2<br>BSPCR2            | TTTTTATCGTTTTTCGGTTCGG<br>CTACAACCCATACCACCAAAA                | To study DNA methylation of the coding region of position 181 to 651 of $E^1$ , $E^2$ and $E^3$ |
| 24 | BSPCF3<br>BSPCR3            | TTTTGGTTTGAGTTTTTGAGG<br>CAACAAATCCTTAACCAAAATCA               | To study DNA methylation of the coding region of position 361 to 711 of $E^1$ , $E^2$ and $E^3$ |
| 25 | BSPCF4                      | TGATTTGGTTAAGGATTTGTTG                                         | To study DNA methylation of the coding region of position 689 to 1143                           |

|    |        |                               |                                                                         |
|----|--------|-------------------------------|-------------------------------------------------------------------------|
|    | BSPCR4 | AAATAATCAATAACAAATTTA         | of $E^1$ , $E^2$ and $E^3$                                              |
| 26 | BSPCF5 | TTTAAATTTGTTATTGATTATTTTTGT   | To study DNA methylation of the coding region of position 1141 to 1411  |
|    | BSPCR5 | CATTACTTAAAACCCACCCAA         | of $E^1$ , $E^2$ and $E^3$                                              |
| 27 | BSPCF6 | GTTAGGGTTTAAGTGTAATAG         | To study DNA methylation of the coding region of position 1365 to 1515  |
|    | BSPCR6 | CCGACCGTTTTAAACACGAATC        | of $E^1$ , $E^2$ and $E^3$                                              |
| 28 | BSP1F  | ATTTTTTGGTATTTTTTATAGGATTAT   | To study DNA methylation of the promoter region of position -143 to 56  |
|    | BSP1R  | AATAAACCRATAAACTTTTCC         | of $E^1$                                                                |
| 29 | BSP1F  | ATTTTTTGGTATTTTTTATAGGATTAT   | To analyze DNA methylation of the promoter region of position -5042     |
|    | BSP2R  | AATTCCTATTTATCRACAAAAAA       | to -4843 of $E^2$ and $E^3$                                             |
| 30 | BSP2F  | TAAAGAAGATTTTTGTAGTTAGAGATAGA | To study DNA methylation of the promoter region of position -335 to -79 |
|    | BSP3R  | ACTCATACTCATACAAACATACACA     | and position -5234 to -4978 of $E^2$ and $E^3$                          |
| 31 | OF     | ATGACGTCCGTTAACGTA            | To produce marker specific for e                                        |
|    | GR     | AAGGTGCCAGAACACTGCTC          |                                                                         |
| 32 | MF     | CAATGTGTATGCCTGCATGA          | To generate marker specific for $E^2$                                   |
|    | MR     | CGAGTATCGAGCTATGTCTG          |                                                                         |
| 33 | AtSN1F | AGTGGTGGTTGTATAAGTTTAG        | To amplify the <i>AtSN1</i> (positive control for bisulfite sequencing) |
|    | AtSN1R | TAAACATAAAAAAAAAATTCCTTT      |                                                                         |

\*: *FAE1* gene-specific primer for the primary PCR. The adapter primer for the primary PCR is AP1 (5'-GTAATACGACTCACTATAGGGC -3') (Siebert et al., 1995).

\*\* : *FAE1* gene-specific primer for the nested (secondary) PCR. The adapter primer for the nested PCR is AP2 (5'-ACTATAGGGCACGCGTGGT -3') (Siebert et al., 1995).
